# Supplementary material for: Critical assessment of LC3/GABARAP ligands used for degrader development and ligandability of LC3/GABARAP binding pockets
Source: Springer Nature journal article supplement (doi:10.1038/s41467-024-54409-5), 2024-11-25
Supplement: MOESM1 [file 41467_2024_54409_MOESM1_ESM.pdf]

## Supplementary information

### Critical assessment of LC3/GABARAP ligands used for degrader development and ligandability of LC3/GABARAP binding pockets

Martin P. Schwalm<sup>1,2,3</sup>, Johannes Dopfer<sup>1,2</sup>, Adarsh Kumar<sup>1</sup>, Francesco A. Greco<sup>1,2</sup>, Nicolas Bauer<sup>1,2</sup>, Frank Löhr<sup>4</sup>, Jan Heering<sup>5</sup>, Sara Cano-Franco<sup>6,7</sup>, Severin Lechner<sup>8</sup>, Thomas Hanke<sup>1,2</sup>, Ivana Jaser<sup>9</sup>, Viktoria Morasch<sup>1,2</sup>, Christopher Lenz<sup>1,2</sup>, Daren Fearon<sup>10</sup>, Peter G. Marples<sup>10</sup>, Charles W. E. Tomlinson<sup>10</sup>, Lorene Brunello<sup>6,7</sup>, Krishna Saxena<sup>1,2</sup>, Nathan B. P. Adams<sup>9</sup>, Frank von-Delft<sup>10</sup>, Susanne Müller<sup>1,2</sup>, Alexandra Stolz<sup>6,7</sup>, Ewgenij Proschak<sup>1,5</sup>, Bernhard Kuster<sup>8</sup>, Stefan Knapp<sup>1,2,3\*</sup>, Vladimir V. Rogov<sup>1,2\*</sup>

<sup>1</sup>Institute for Pharmaceutical Chemistry, Department of Biochemistry, Chemistry and Pharmacy, Goethe University Frankfurt, Max-von-Laue-Straße 9, 60438 Frankfurt, Germany

<sup>2</sup>Structural Genomics Consortium, Buchmann Institute for Molecular Life Sciences, Goethe University Frankfurt, Max-von-Laue-Straße 15, 60438 Frankfurt, Germany

<sup>3</sup>German Cancer Consortium (DKTK) / German Cancer Research Center (DKFZ), DKTK site Frankfurt-Mainz, 69120 Heidelberg, Germany

<sup>4</sup>Institute for Biophysical Chemistry, Department of Biochemistry, Chemistry and Pharmacy, Goethe University Frankfurt, Max-von-Laue-Straße 9, 60438 Frankfurt, Germany

<sup>5</sup>Fraunhofer Institute for Translational Medicine and Pharmacology ITMP, Theodor-Stern-Kai 7, 60596 Frankfurt, Germany

<sup>6</sup>Institute of Biochemistry II (IBC2), Faculty of Medicine, Goethe University, Theodor-Stern-Kai 7, 60590, Frankfurt am Main, Germany.

<sup>7</sup>Buchmann Institute for Molecular Life Sciences (BMLS), Goethe University, Max-von-Laue-Straße 15, 60438, Frankfurt am Main, Germany.

<sup>8</sup>Chair of Proteomics and Bioanalytics, TUM School of Life Sciences, Technical University of Munich, 85354 Freising, Germany

<sup>9</sup>NanoTemper Technologies GmbH, Flößergasse 4, 81369 Munich, Germany.

<sup>10</sup>Diamond Light Source Ltd., Harwell Science and Innovation Campus, Didcot OX11 0QX, UK.

\*correspondence: [knapp@pharmchem.uni-frankfurt.de](mailto:knapp@pharmchem.uni-frankfurt.de), [rogov@pharmchem.uni-frankfurt.de](mailto:rogov@pharmchem.uni-frankfurt.de)

## Table of content:

|                                                                                                                                                |               |
|------------------------------------------------------------------------------------------------------------------------------------------------|---------------|
| <b>Supplementary Figures</b>                                                                                                                   | <b>S4-S23</b> |
| Supplementary Figure 1. Chemical structures of the compounds used in this study.                                                               | S4            |
| Supplementary Figure 2. Establishment of diverse binding assays for all human Atg8 homologs (LC3/GABARAPs).                                    | S5            |
| Supplementary Figure 3. Interaction between LC3B and compounds <b>12</b> and <b>1-4</b> investigated by NMR.                                   | S7            |
| Supplementary Figure 4. Characterization of compounds binding to LC3/GABARAP proteins.                                                         | S9            |
| Supplementary Figure 5. Interaction between GABARAPL2 and compounds <b>1-4</b> investigated by NMR.                                            | S11           |
| Supplementary Figure 6. ESI mass spectrometry for all LC3/GABARAP proteins treated with compounds <b>5-7</b> .                                 | S13           |
| Supplementary Figure 7. ESI mass spectrometry for GABARAPL2 treated with different concentrations of compound <b>4</b> .                       | S15           |
| Supplementary Figure 8. Cellular assays.                                                                                                       | S16           |
| Supplementary Figure 9. Microscopy images.                                                                                                     | S18           |
| Supplementary Figure 10. Interaction between LC3B/GABARAP proteins and compound <b>21</b> .                                                    | S19           |
| Supplementary Figure 11. Results of TH152 ( <b>21</b> ) docking onto the LC3B structure with interacting residues marked as determined by NMR. | S21           |
| Supplementary Figure 12. Chemical properties of virtually screened compounds and distribution of resulting scores.                             | S22           |
| Supplementary Figure 13. Electron densities of selected compounds in the corresponding LC3B structures.                                        | S24           |

|                                                                                          |         |
|------------------------------------------------------------------------------------------|---------|
| <b>Supplementary Tables</b>                                                              | S25-S32 |
| Supplementary Table 1. Structure-activity relationship of sulfonamide-based compounds.   | S25     |
| Supplementary Table 2. Structure-activity relationship of benzothiazole based compounds. | S26     |
| Supplementary Table 3. Structure-activity relationship of pyrimidine-based compounds.    | S27     |
| Supplementary Table 4. X-ray data collection and refinement statistics.                  | S29     |
| Supplementary Table 5. Small molecule screening data.                                    | S33     |
| <b>Supplementary References</b>                                                          | S34-S35 |

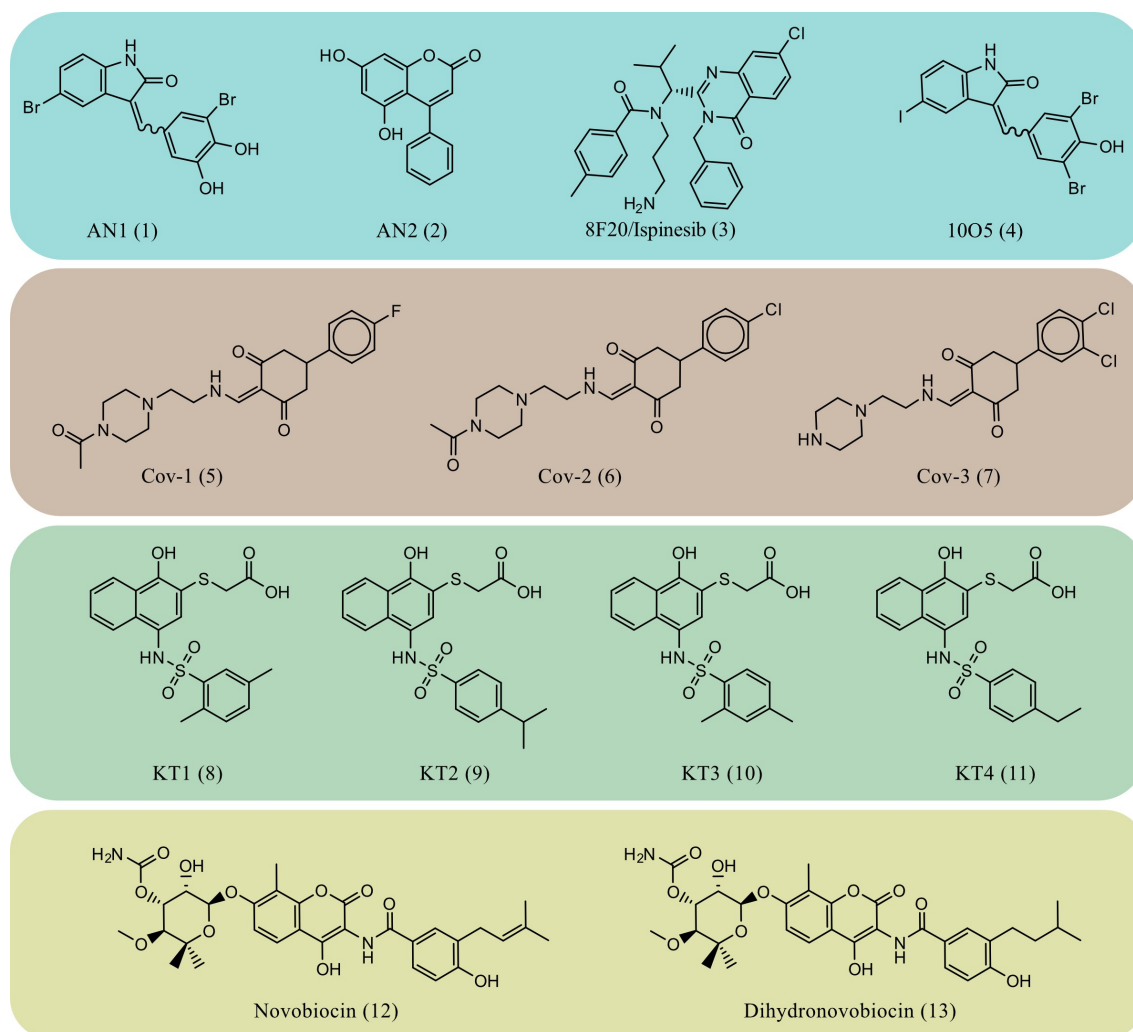

Supplementary Fig. 1: **Chemical structures of the compounds used in this study.** Cyan panel: prototypical ATTEC compounds published by Li et al.<sup>1</sup> Brown panel: Derivatives of covalent inhibitors reported by Fan et al.<sup>2</sup> Green panel: Derivatives of compounds reported by Tsuganezawa et al.<sup>3</sup> Yellow panel: Novobiocin and derivative reported by Hartmann et al.<sup>4</sup>

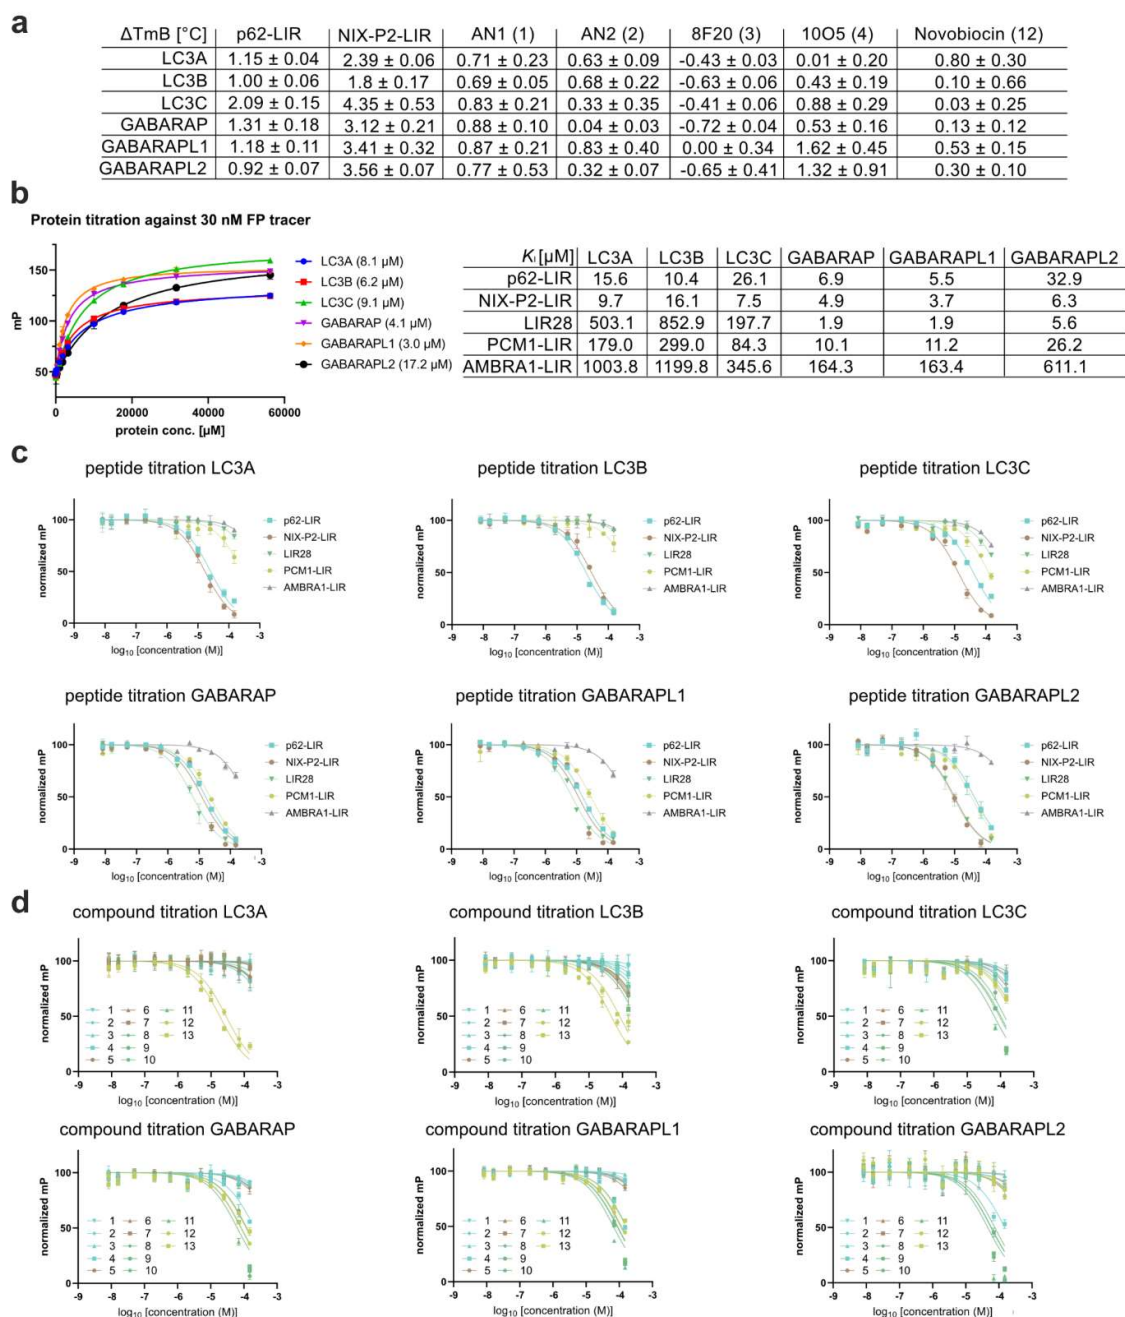

Supplementary Fig. 2: **Establishment of diverse binding assays for all human Atg8 homologs (LC3/GABARAPs).** **a** Results from DSF screening given as °C difference (according to Boltzmann fit) to the DMSO control ( $\Delta T_m B$ ). Control peptides p62-LIR and NIX-P2-LIR stabilized the protein up to 4 °C, while compound-induced stabilization could not be observed, also for the positive control compound Novobiocin. Data were measured in technical replicates (n=3). **b** Protein titration of the different LC3/GABARAPs against the Cy5-

labelled p62-LIR peptide depicted with the calculated KD value (left). Table with measured Ki values for a set of different peptides (right), with corresponding curves shown in C). Data were measured in technical replicates (n=3) with error bars depicting the SD. Measured affinities are in agreement with the published affinity data.<sup>5-9</sup> **c** Peptide displacement experiments of five control peptides against all LC3/GABARAPs. Data were measured in technical replicates (n=2) with error bars depicting the SD. **d** Displacement curves of the compound set (**1-13**, Supplementary Fig. 1) against all LC3/GABARAPs measured in technical replicates (n=2) with error bars depicting the SD. Source data for Supplementary Fig. 2b,c,d are provided as a Source Data file.

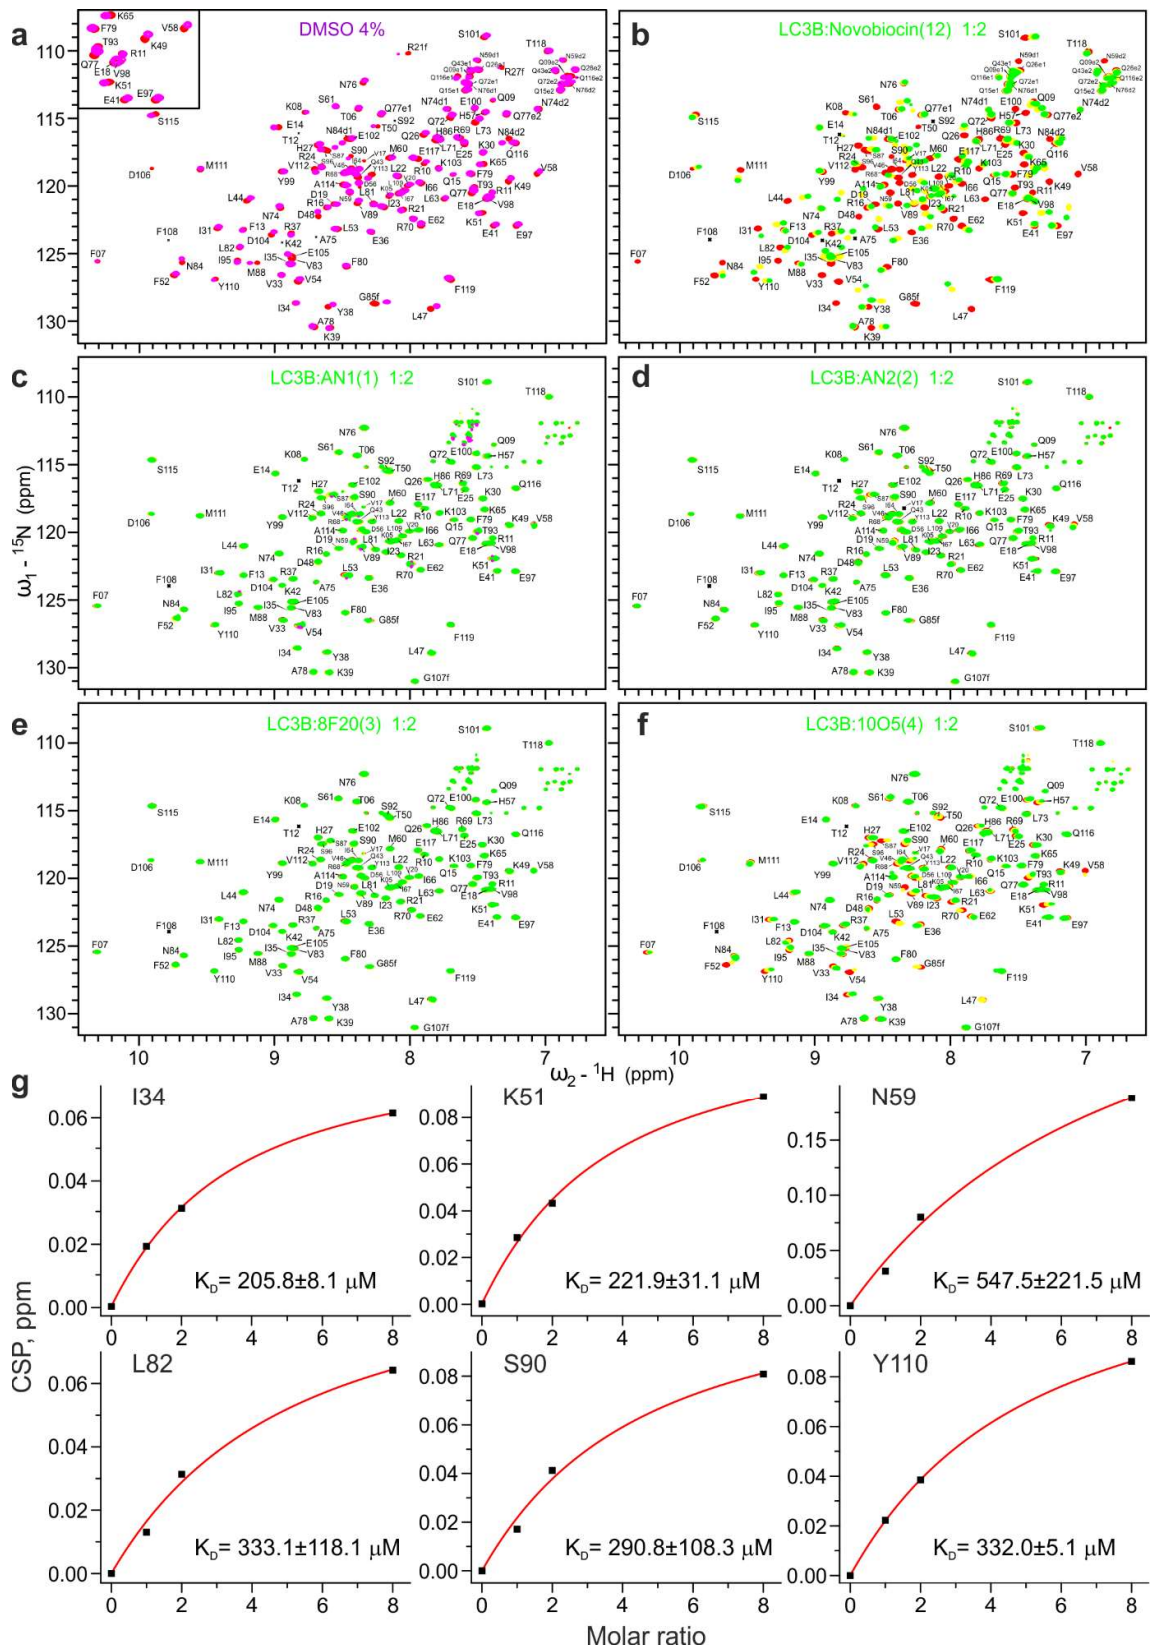

Supplementary Fig. 3: **Interaction between LC3B and compounds 12 and 1-4 investigated by NMR.** **a** CSPs of LC3B resonances induced by addition of 4% DMSO into  ${}^{15}\text{N}$ -labelled

LC3B. Reference LC3B [ $^1\text{H}$ - $^{15}\text{N}$ ]-fHSQC spectrum (red) in overlay with the LC3B spectrum in presence of 4% DMSO (magenta). Both spectra were recorded at 700 MHz spectrometer. The small square in the upper left corner shows the LC3B representative (fingerprint) region around residues K51 and V58 depicted in Fig. 2d. **b** NMR titration of LC3B with positive control compound Novobiocin (**12**). Full [ $^1\text{H}$ - $^{15}\text{N}$ ]-HSQC spectra of free LC3B (red) overlaid with LC3B spectra in presence of Novobiocin (**12**) in 1:1 molar ratio (yellow) and 1:2 molar ratio (green). The spectra were recorded at 700 MHz spectrometer. **c-e** NMR titrations of LC3B with AN1 (**1**), AN2 (**2**) and 8F20 (**3**) in 1:1 molar ratio (yellow) and 1:2 molar ratio (green). The [ $^{15}\text{N}$ ,  $^1\text{H}$ ] BEST-TROSY spectra were recorded at 800 MHz spectrometer. **f** NMR titration of LC3B with 10O5 (**4**) in 1:1 molar ratio (yellow) and 1:2 molar ratio (green). The [ $^{15}\text{N}$ ,  $^1\text{H}$ ] BEST-TROSY spectra were recorded at 800 MHz spectrometer. **g** Estimation of  $K_D$  values for LC3B:10O5 interaction.  $K_D$  values (in  $\mu\text{M}$ ) calculated for the selected LC3B residues (indicated on each plot). Original CSP values are shown as black squares, and the resulting fit is given as a red line in each plot. The selection criteria were I) the residues should be located within or near the interaction surfaces, II) the resonances should be clearly trackable at all titration steps. For all NMR experiments,  $n=1$ . Source data for Supplementary Fig. 3g are provided as a Source Data file.



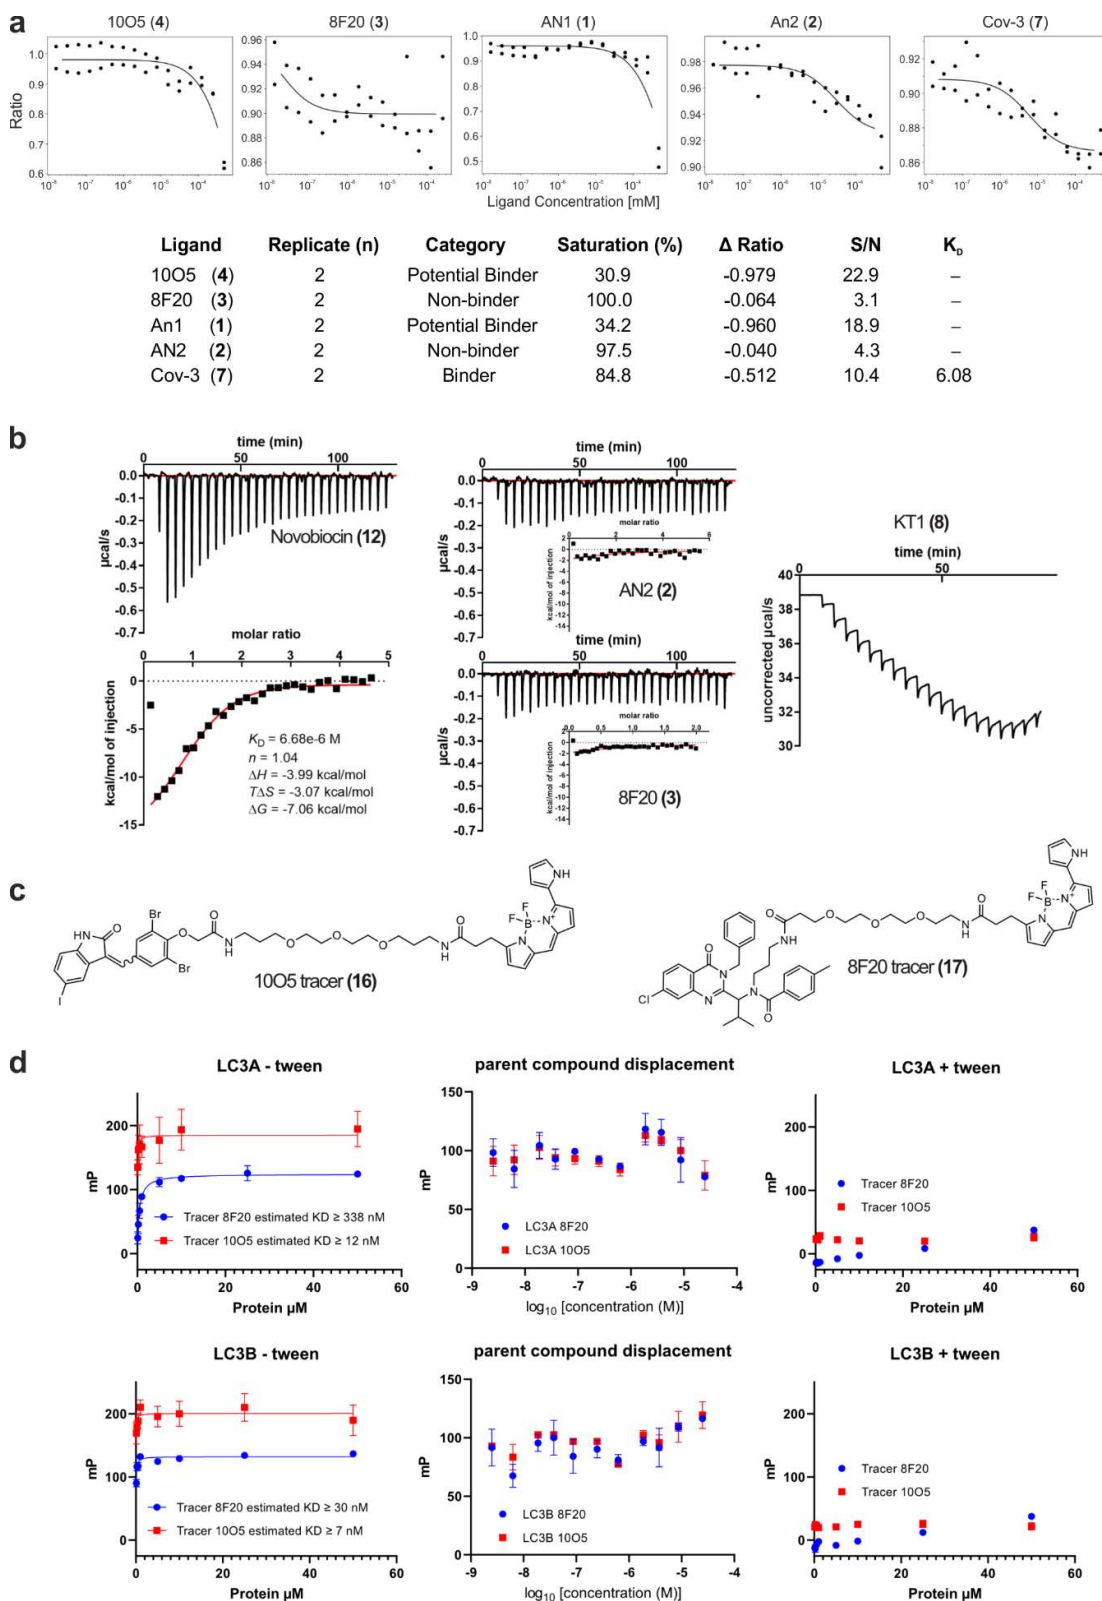

Supplementary Fig. 4: **Characterization of compounds binding to LC3/GABARAP**

**proteins. a** Obtained plots from the spectral shift measurements of selected compounds (upper

panel) and the extracted binding information (lower table) (n=2). **b** ITC measurement of Novobiocin (left measurement) and the ATTEC handles AN2 (**2**) and 8F20 (**3**) (middle panels) against LC3A. Other compounds (**1**, **4**, **5-8** etc.) displayed low solubility in the buffer system used and/or caused protein precipitation. These properties resulted in inconclusive ITC measurements as exemplary depicted for compound **8** (right upper panel) (n=1). **c** Structure of 10O5 (**4**)-based tracer compound **16** and the 8F20 (**3**)-based tracer compound **17**. **d** Fluorescence polarization assay utilizing tracers **16** and **17** for interaction studies with LC3A (upper panels) and LC3B (lower panels). The left panels depict protein titration measurements for tracer  $K_D$  determination indicating nanomolar tracer affinity as presented in<sup>10</sup>, lacking detergent in the buffer to suppress unspecific binding. Middle panels depict displacement experiments using compound **3** for tracer **17** and compound **4** for tracer **16** showing no displacement, indicating unspecific binding during protein titration. Right panels show a repeated protein titration with 0.05% Tween20 supplemented buffer, completely abolishing the putative binding, revealing unspecific binding of the tracers. Data were collected in technical triplicates with error bars expressing the SD (n=3). Source data for Supplementary Fig. 4a,b,d are provided as a Source Data file.

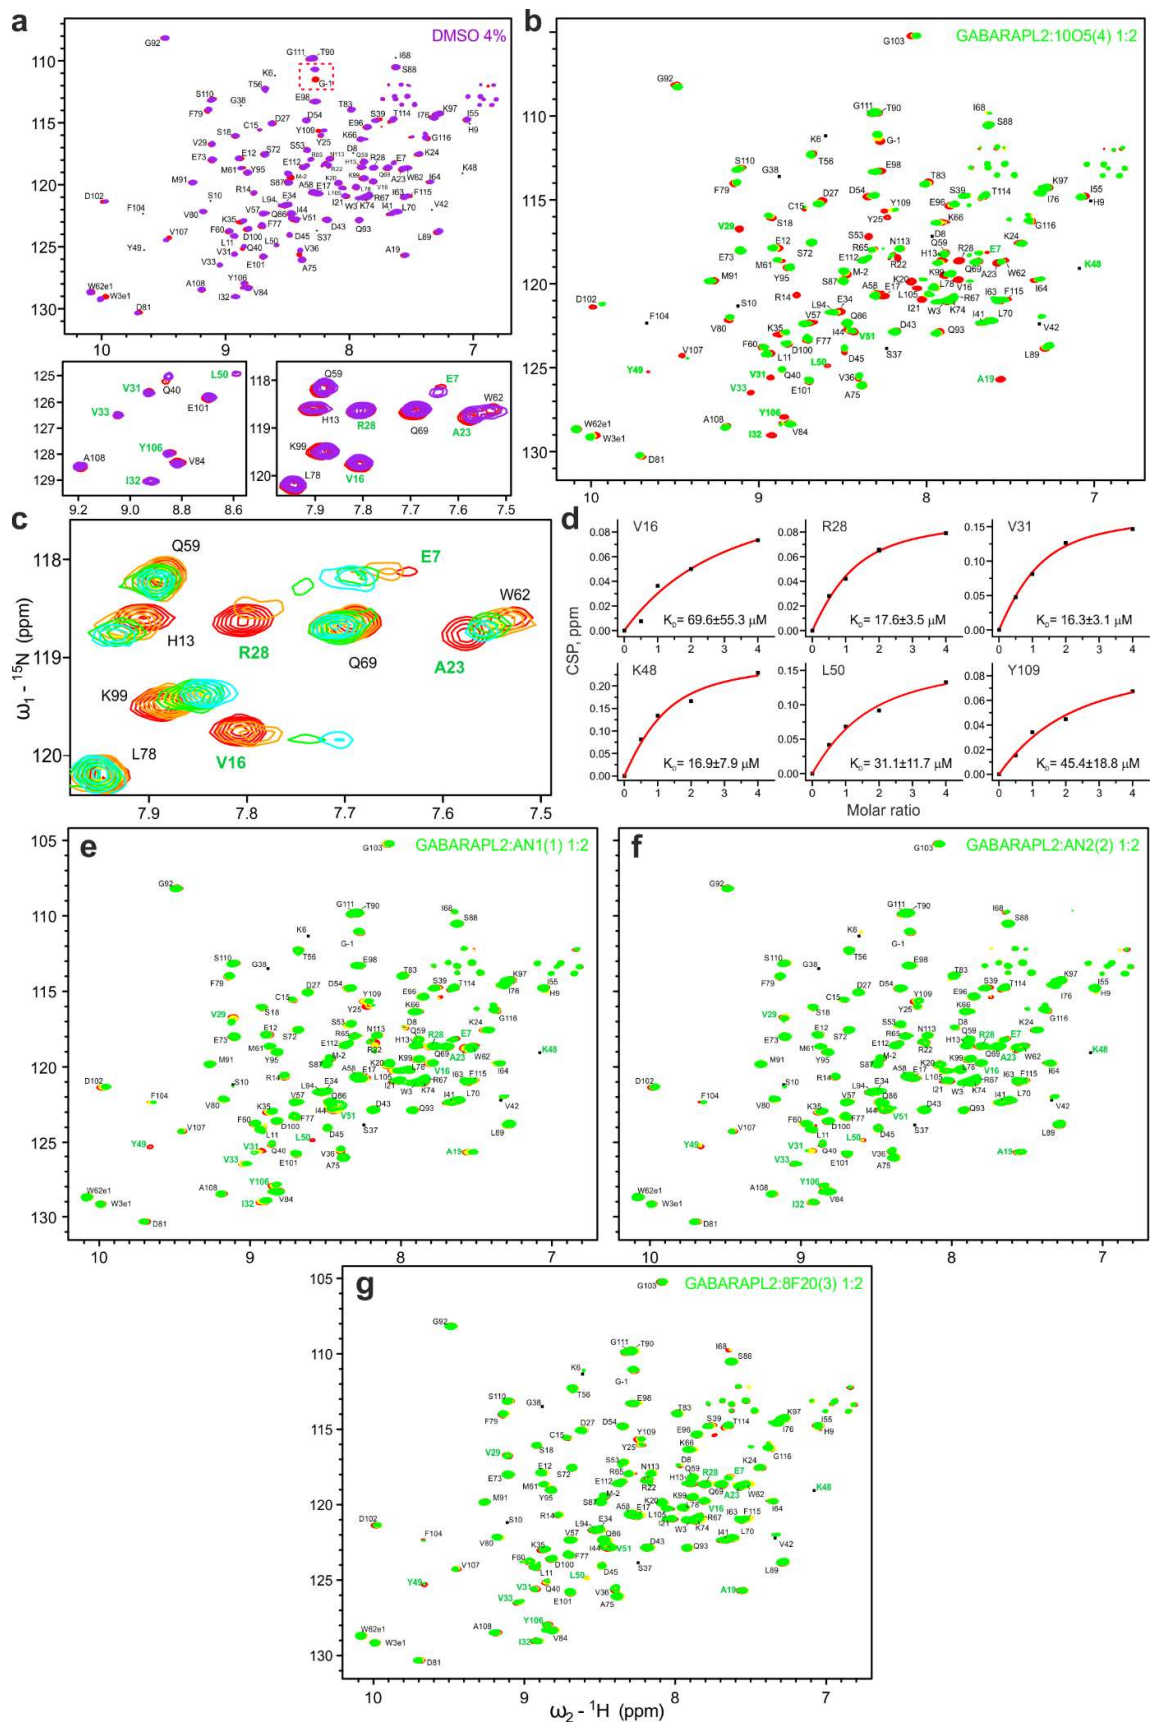

Supplementary Fig. 5: **Interaction between GABARAPL2 and compounds 1-4 investigated by NMR.** **a** CSPs of GABARAPL2 resonances induced by addition of 4% DMSO into  $^{13}\text{C}$ ,  $^{15}\text{N}$ -labelled GABARAPL2. Upper plot: reference GABARAPL2 [ $^{15}\text{N}$ ,  $^1\text{H}$ ] BEST-TROSY (900 MHz spectrometer) full spectrum (red) in overlay with the GABARAPL2 spectrum in presence of 4% DMSO. Lower plots show the GABARAPL2 representative (fingerprint) regions around residues L50 (left) and V16 (right). **b-e** NMR titration of GABARAPL2 with 10O5 (**4**). **b** Full [ $^{15}\text{N}$ ,  $^1\text{H}$ ] BEST-TROSY spectrum (900 MHz spectrometer) of free GABARAPL2 (red) overlaid with GABARAPL2 spectrum in presence of 10O5 in 1:6 molar ratio (blue). **c** Representative region of the [ $^{15}\text{N}$ ,  $^1\text{H}$ ] BEST-TROSY GABARAPL2 spectrum upon titration of GABARAPL2 with 10O5 (free protein – red, molar ratios of 1:0.5, 1:1, 1:2 and 1:4 are given in orange, yellow, green and cyan, respectively). **d** Estimation of  $K_D$  values for GABARAPL2:10O5 (**4**) interaction.  $K_D$  values (in  $\mu\text{M}$ ) calculated for the selected GABARAPL2 residues (indicated on each plot). Original CSP values are shown as black squares, and the resulting fit is given as a red line in each plot. The selection criteria were identical to the one described in Supplementary Fig. 3. **e-g** NMR titrations of GABARAPL2 with AN1 (**1**), AN2 (**2**) and 8F20 (**3**), respectively (600 MHz spectrometer). For all NMR experiments,  $n=1$ . Source data for Supplementary Fig. 5d are provided as a Source Data file.

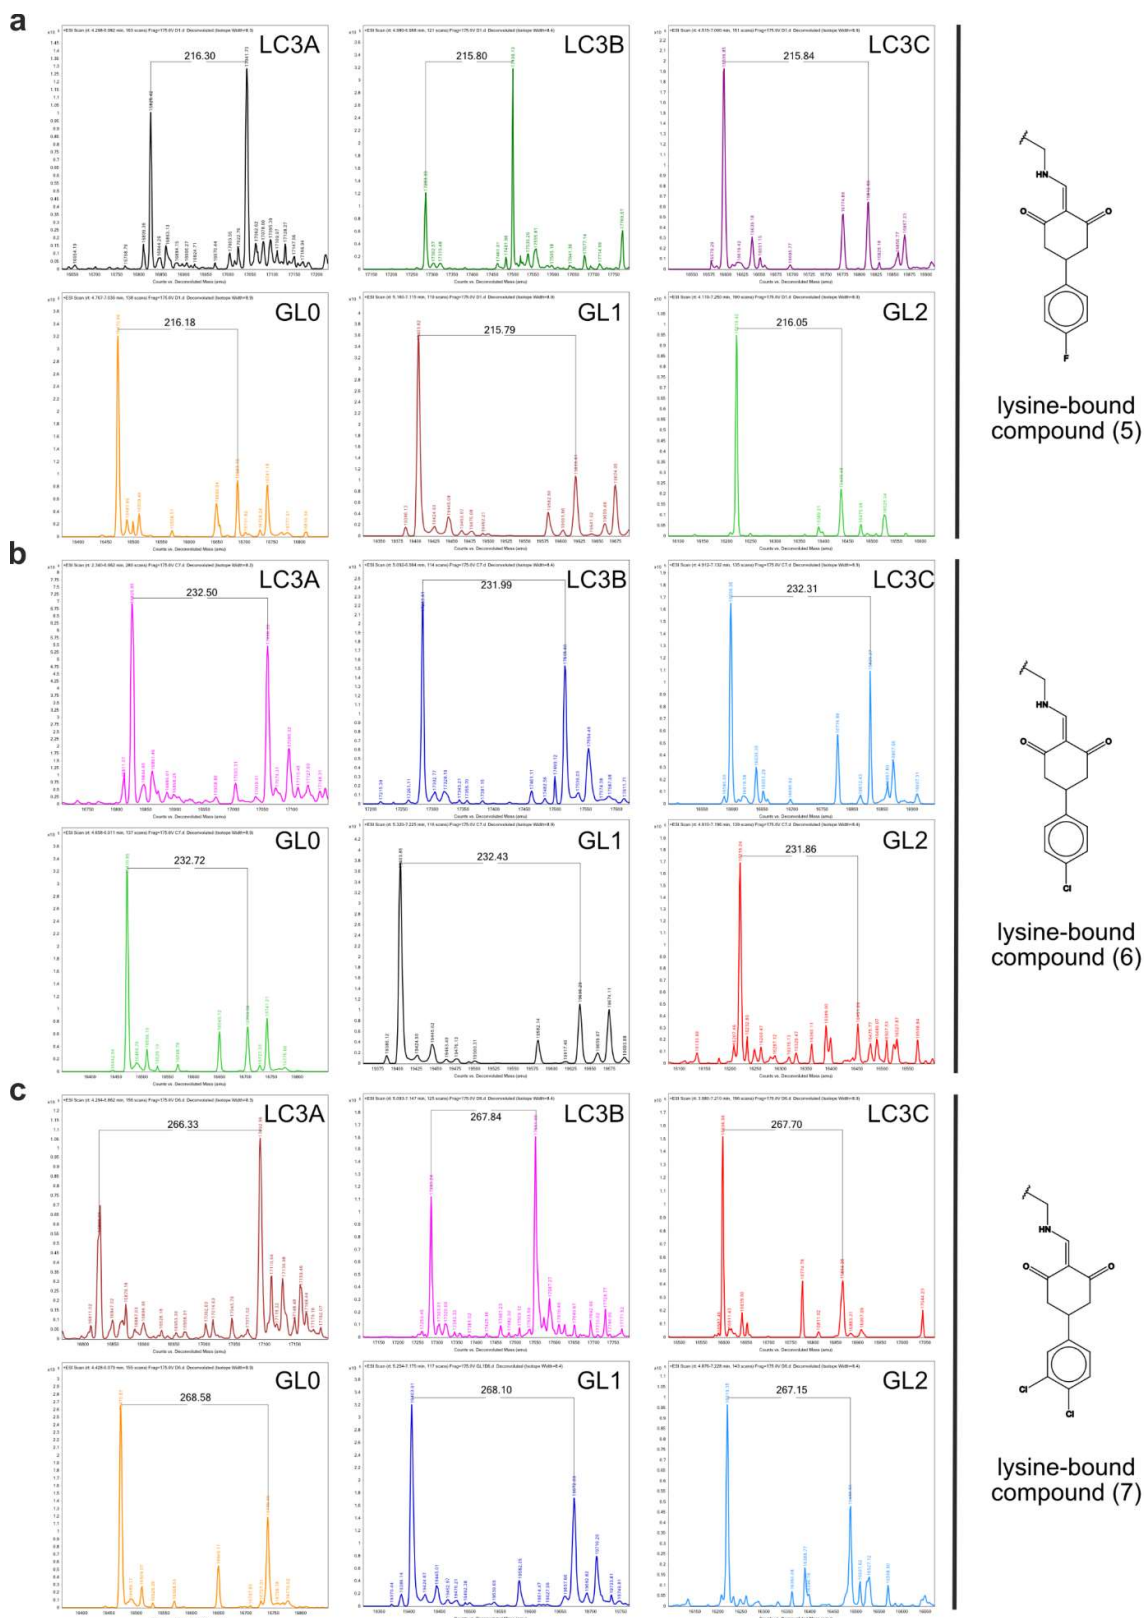

Supplementary Fig. 6: **ESI mass spectrometry for all LC3/GABARAP proteins treated with compounds 5-7.** **a** Mass shifts obtained from treatment with compound **5**. All LC3/GABARAPs were successfully labelled with the highest labelling ratio on LC3A und LC3B. **b** Mass shifts obtained from treatment with compound **6**. All LC3/GABARAPs were successfully labelled with the highest labelling ratio of all LC3 proteins. **c** Mass shifts obtained from treatment with compound **7**. All Atg8 homologs were successfully modified with the highest ratio on LC3A und LC3B (n=1)

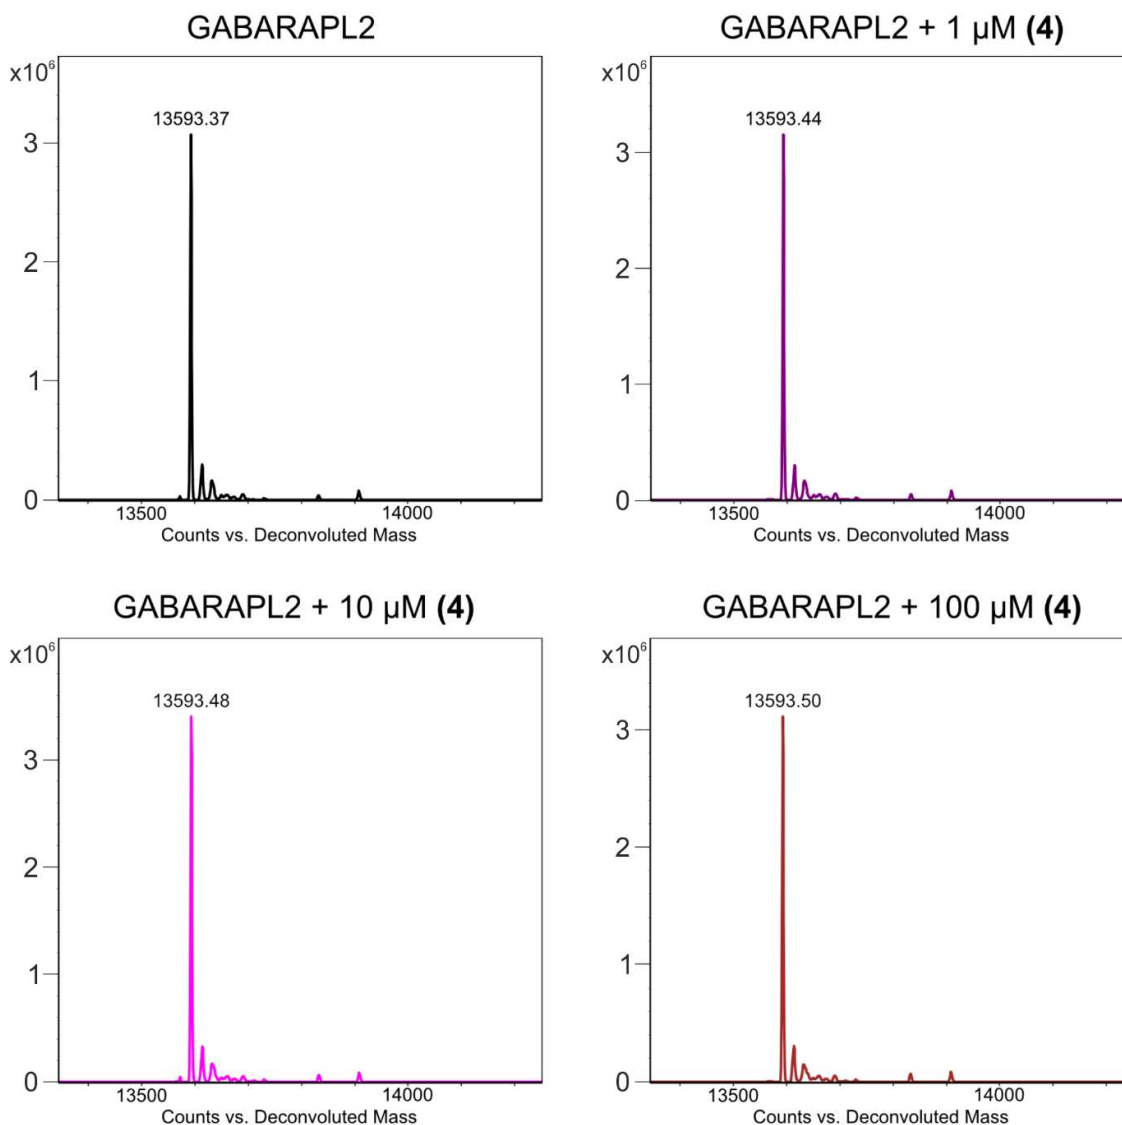

Supplementary Fig. 7: **ESI mass spectrometry for GABARAPL2 treated with different concentrations of compound 4.** To test covalent modification of GABARAPL2 (targeted by 4 with the highest affinity) different concentrations of 4 were incubated for 90 minutes at room temperature with 50  $\mu$ M protein. None of the treatments showed a mass shift (as seen e.g. in Supplementary Figure 6) indicating no covalent modification of GABARAPL2 by 10O5 (n=1).



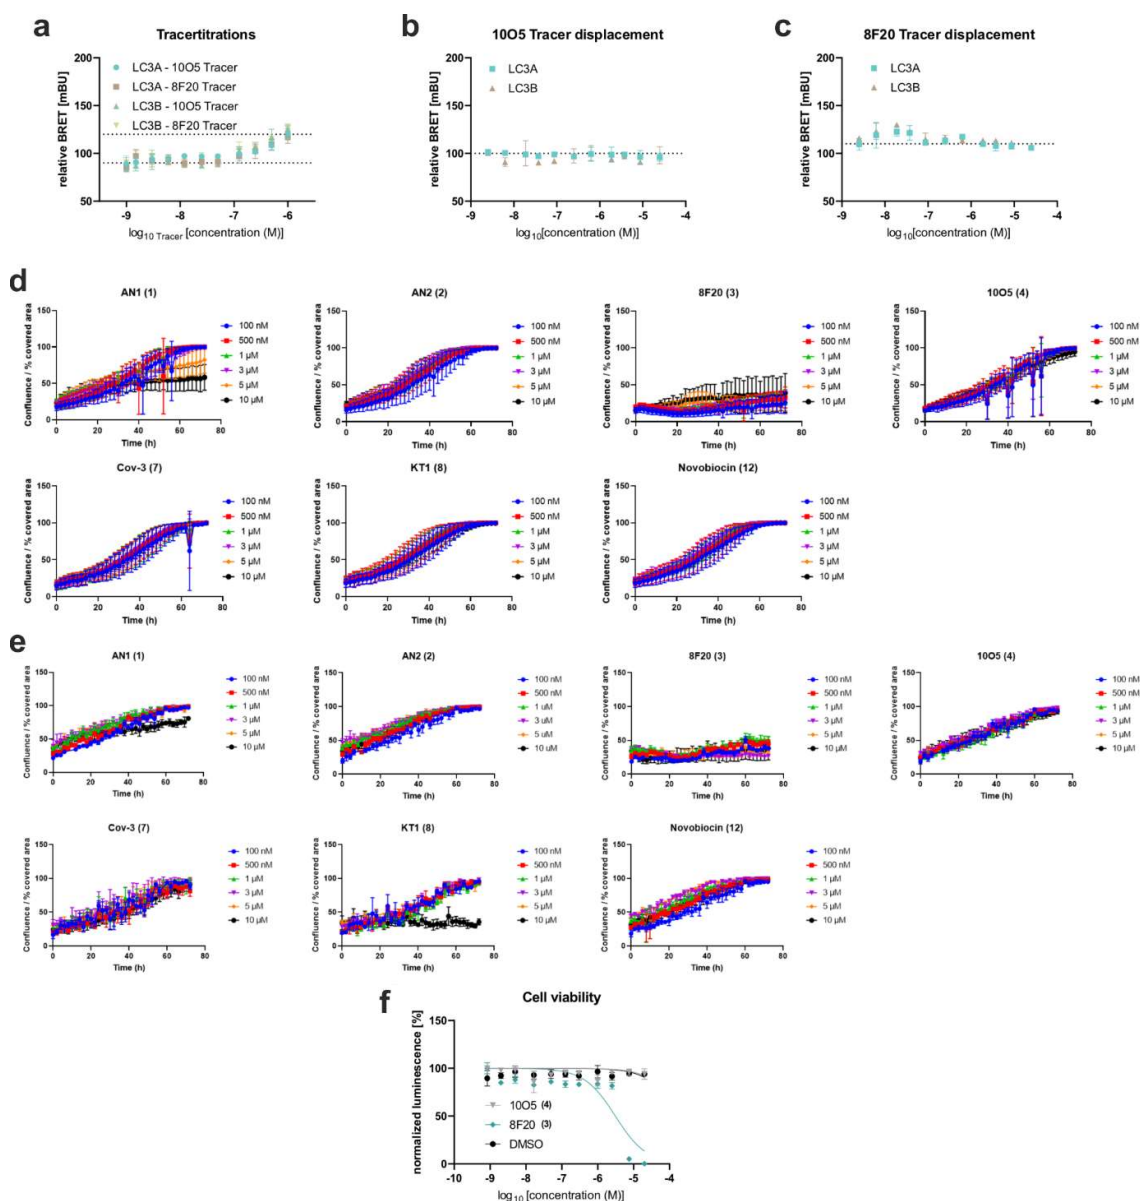

Supplementary Fig. 8: **Cellular assays.** **a** tracer titration of compounds **16** and **17** (Supplementary Fig. 4) against NanoLuciferase-tagged LC3A and LC3B showing a maximum BRET increase of ~1.3-fold, indicating unspecific BRET increase due to the presence of higher fluorophore concentrations. Displacement assays were carried out to test specific compound binding on LC3A (**b**) and LC3B (**c**) through tracer displacement using compound **4** for tracer compound **16** and compound **3** for tracer compound **17**. No displacement at 1  $\mu$ M of the tracer compounds proves the hypothesis of unspecific BRET increase, therefore showing no compound-LC3 interaction. Measurements were carried out in biological replicates (n=2) with



error bars expressing the SD. **d** RPE1 growth was detected based on the cells confluence within the well. Outliers were determined to be faulty collected images. Apart from high dosage effects of compounds **1**, only compound **3** lead to significant growth reduction. Data were collected in biological replicates with technical triplicates each (n=6) and are presented as a means with error bars expressing the SD. **e** Growth curves of U2OS cells, treated with different small molecules. Growth was detected based on the cell confluence in the well. For U2OS cells, compound **8** shows a drastic effect at the highest concentration, while compound **3** leads to significant growth inhibition in all tested concentrations. Data was collected in technical triplicates (n=3) and error bars expressing the SD. **f** Cell viability measurements of the ATTEC handles 8F20 (**3**) and 10O5 (**4**) indicating no viability/toxicity effect of compound **4** while compound **3** treatment led to viability loss in the high  $\mu\text{M}$  range. Data were collected in biological replicates (n=2) with error bars expressing the SD. Data agrees with published viability data.<sup>1</sup> Source data for Supplementary Fig. 8a-f are provided as a Source Data file.

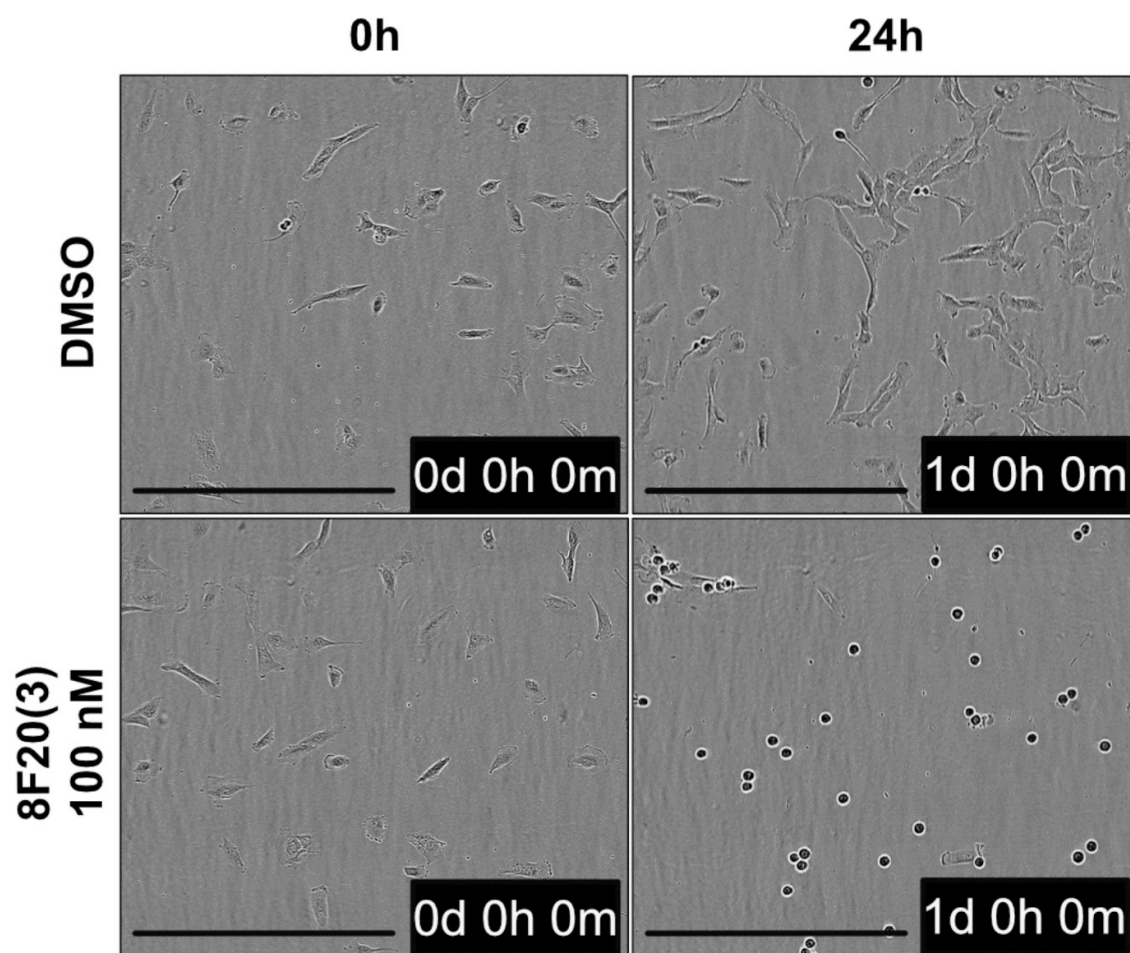

Supplementary Fig. 9: **Microscopy images** acquired with the IncuCyte S3 (10x) show rounding of RPE1 cells after treatment with compound **3** for 24h. Scale bar reflects 500  $\mu$ m.



LC3B spectra in presence of **21** in increasing molar ratios (1:0.125 – orange, 1:0.25 – yellow, 1:0.5 – green, 1:1 – cyan, 1:2 – blue and 1:4 – magenta). **b** LC3B:**21** interaction revealed strong similarity with LC3B:**12** interaction. Upper plot: representative spectra area around L44 backbone HN resonance for titration with **21** and **12** (indicated on each graph). Lower plot: representative spectra area around G85 backbone HN resonance for titration with **21** and **12**. **c** Estimation of  $K_D$  values for LC3B:**21** interaction.  $K_D$  values calculated for the selected LC3B residues (indicated on each plot) upon titration with **21**. Original CSP values are shown as black squares and the resulting fit is given as a red line in each plot. The selection criteria were identical as described in Supplementary Fig. 3. **d-i** Interaction between GABARAP and compound **21** investigated by NMR. **d** Full [ $^{15}\text{N}$ , $^1\text{H}$ ] BEST-TROSY spectrum (950 MHz spectrometer) of free GABARAP overlaid with GABARAP spectra in presence of **21** in increasing molar ratios (the same colorcode as for LC3B titration). Non-assigned peaks in the presented spectra are from Gln and Asn sidechain  $\text{NH}_2$  resonances, and from traces of the GABARAP degradation peptides. **e-f** Representative regions of the [ $^{15}\text{N}$ , $^1\text{H}$ ] BEST-TROSY GABARAP spectra around key residues K46, K48 and L63 (**e**), and K47, L50 and V51 (**f**) upon titration of GABARAP with **21** (the same colorcode as above). **g** CSP values, induced by compounds **21** at molar ratio 1:2, are plotted against GABARAP residue numbers. The light green dashed line indicates the standard deviations (SD) over all residues, the orange dashed line indicates double SD values. Residues with small ( $\text{CSP} < \text{SD}$ ), intermediate ( $\text{SD} < \text{CSP} < 2\text{xSD}$ ) or strong ( $2\text{xSD} < \text{CSP}$ ) CSP values are marked in grey, light green and orange, respectively. GABARAP residues which undergo strong intermediate exchange mode (significant decrease of the resonances intensity upon titration with **21**) are marked blue. **h** 3D mapping of CSP values on GABARAP structure (PDB ID 1UGM), indicating both hydrophobic pockets, HP1 and HP2, as most relevant interaction sites. The colorcode is the same as above. **i** Estimation of  $K_D$  values for GABARAP:**21** interaction.  $K_D$  values (in  $\mu\text{M}$ ) calculated for the selected GABARAP residues (indicated on each plot) upon titration with **21**. Original CSP values are shown as black squares, and the resulting fit is given as a red line in each plot. The selection criteria were identical as described in Supplementary Fig. 3. For all NMR experiments,  $n=1$ . Source data for Supplementary Fig. 10c,g,i are provided as a Source Data file.

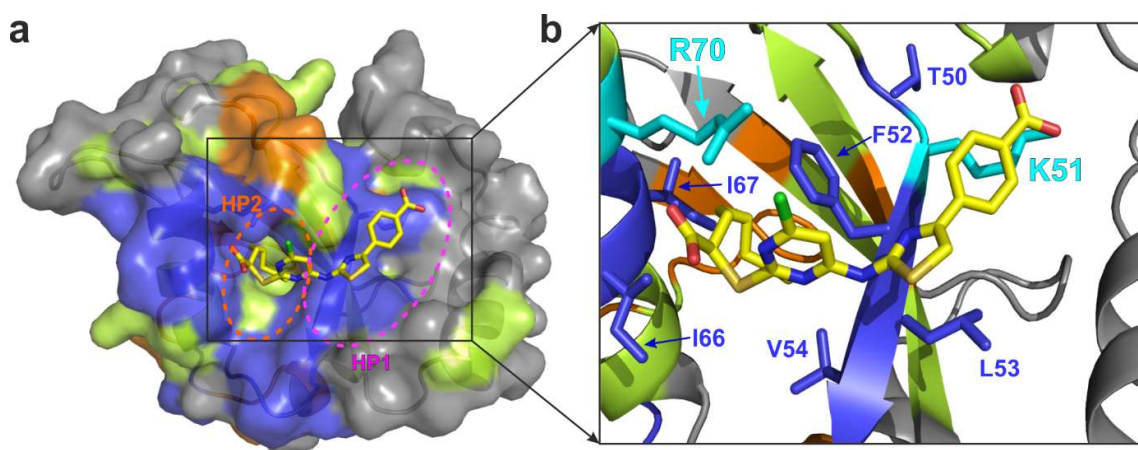

Supplementary Fig. 11: **Results of TH152 (21) docking onto the LC3A structure with interacting residues marked as determined by NMR.** **a** Surface representation of the LC3A structure (PDB ID 6TBE, the same orientation as in Fig. 4e,f) with residues marked by NMR-evaluated strength of interaction observed for LC3B, the closest homolog of LC3A. Residues with small ( $CSP < SD$ ), intermediate ( $SD < CSP < 2 \times SD$ ) or strong ( $2 \times SD < CSP$ ) CSP values are marked in grey, light green and orange, respectively. LC3B residues which undergo strong intermediate exchange mode are marked blue. The structure of TH152 is shown as yellow sticks. Relative positions of hydrophobic pockets HP1 (magenta) and HP2 (orange) are shown by dashed lines. **b** TH152 docked to LC3A (detailed view). Most affected LC3A residues are shown as blue sticks (according to the NMR results for LC3B), key residues K51 and R70 are marked cyan.

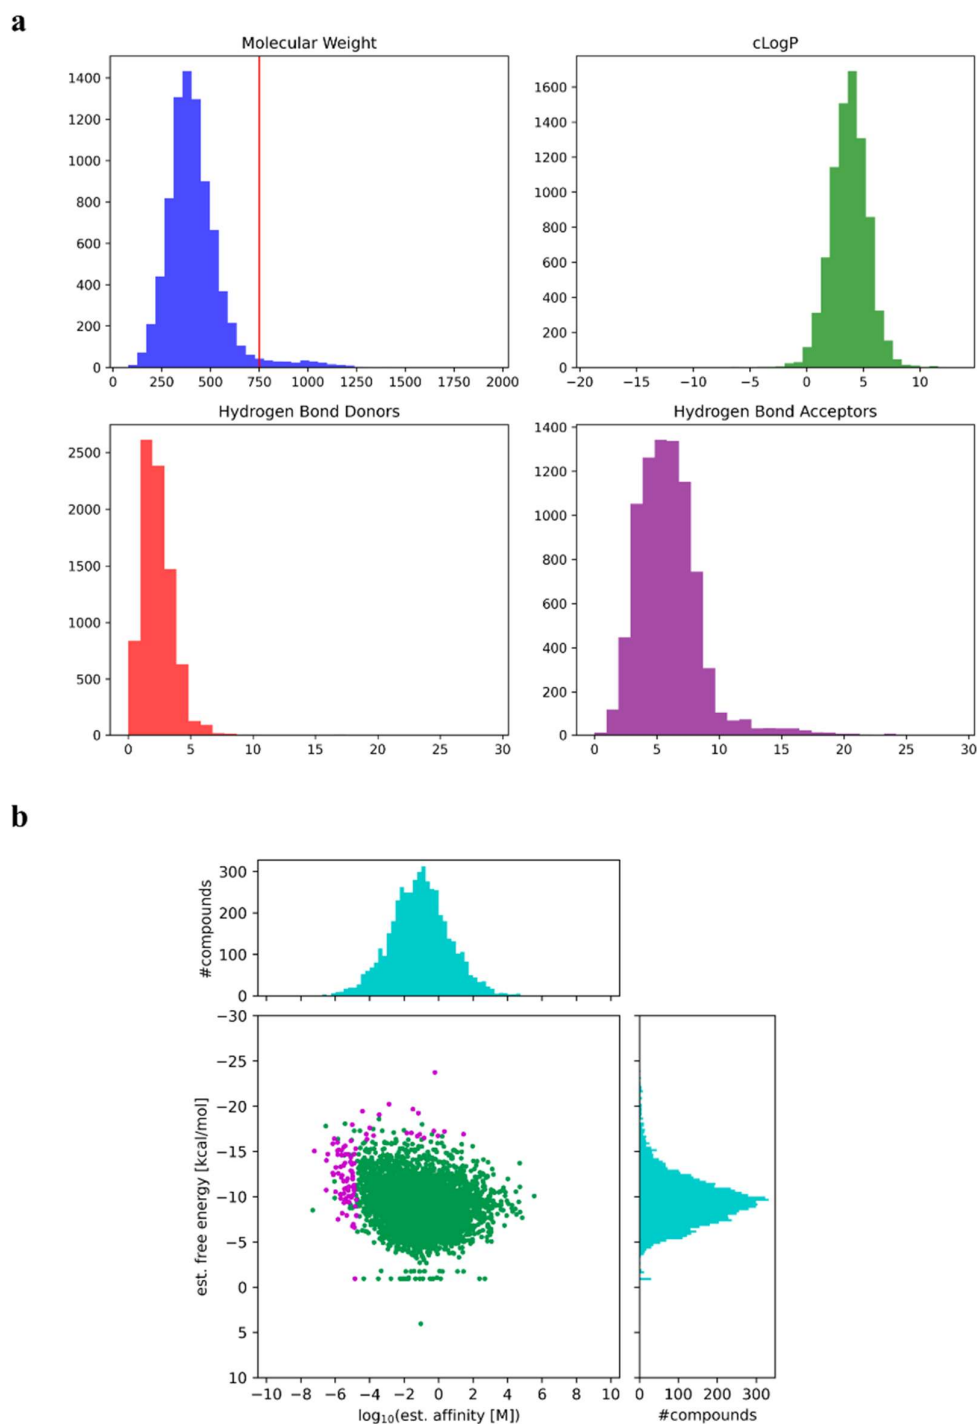

Supplementary Fig. 12: **Chemical properties of virtually screened compounds and distribution of resulting scores.** **a** Chemical properties of the compounds from the in-house library were calculated using the RDKit library. The vertical red line indicates the 750 Da molecular weight threshold, which has been chosen to obtain a set of hits that exhibit drug-like features. **b** Distributions of resulting docking scores from the two docking platforms employed

before applying the molecular weight cut-off. Pink coloration indicates compounds that were selected for the follow up experiments. Source data for Supplementary Fig. 12a,b are provided as a Source Data file.



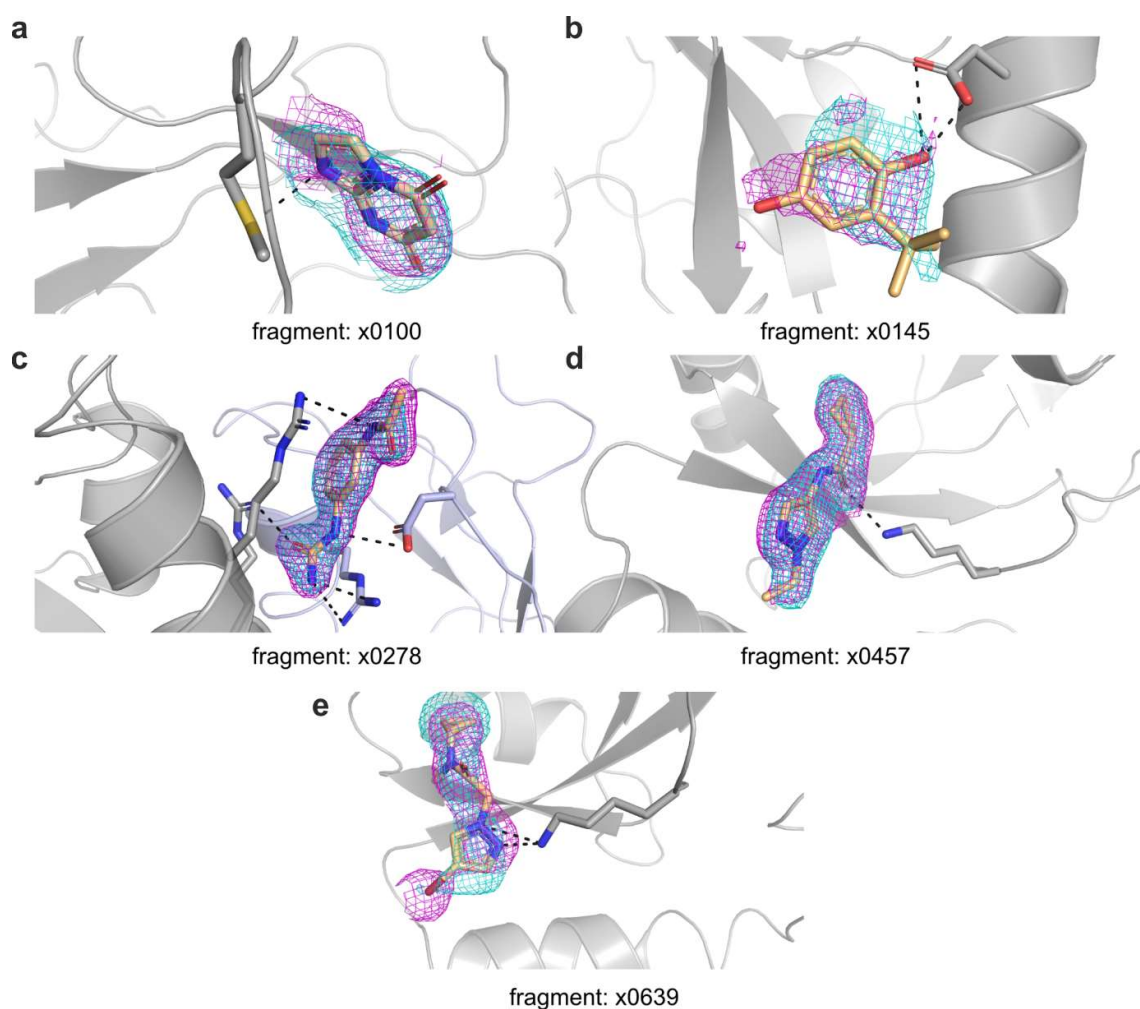

Supplementary Fig. 13: **Electron densities.** Crystallized fragments (**a-e**, each fragment is indicated) bound to LC3B as depicted in Fig. 5. Together with the fragments bound in the crystal structure, the event map (cyan) and the 2Fo-Fc (magenta) are depicted together with interacting residues.



Supplementary Table 1: **Structure-activity relationship of sulfonamide-based compounds<sup>11-13</sup> on LC3A tracer displacement, normalized on p62-LIR positive control.**

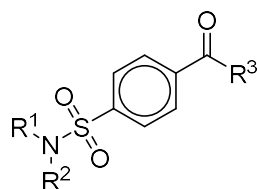

| Cpd-ID  | R <sup>1</sup> | R <sup>2</sup> | R <sup>3</sup> | % tracer bound @LC3A |
|---------|----------------|----------------|----------------|----------------------|
| (TH061) |                |                | OH             | 83                   |
| (TH119) |                |                | OH             | 92                   |
| (TH133) |                |                | OH             | 82                   |
| (TH253) |                | H              |                | 88                   |
| (TH676) |                | H              |                | 84                   |
| (TH281) |                | H              |                | 95                   |
| (TH677) |                | H              |                | 87                   |

Supplementary Table 2: Structure-activity relationship of benzothiazole based compounds<sup>11,14</sup> on LC3A tracer displacement, normalized on p62-LIR positive control.

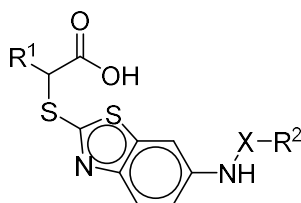

| Cpd-ID  | R <sup>1</sup>  | R <sup>2</sup> | X               | % tracer bound @LC3A |
|---------|-----------------|----------------|-----------------|----------------------|
| (TH195) | <i>n</i> -hexyl |                | CH <sub>2</sub> | 78                   |
| (TH185) | <i>n</i> -hexyl |                | CH <sub>2</sub> | 82                   |
| (TH198) | <i>n</i> -hexyl |                | CH <sub>2</sub> | 79                   |
| (TH191) | <i>n</i> -hexyl |                | CH <sub>2</sub> | 78                   |
| (TH200) | <i>n</i> -hexyl |                | CH <sub>2</sub> | 72                   |
| (TH181) | <i>n</i> -hexyl |                | C=O             | 78                   |
| (TH177) | <i>n</i> -hexyl |                | C=O             | 85                   |
| (TH188) | <i>n</i> -butyl |                | C=O             | 89                   |

Supplementary Table 3: **Structure-activity relationship of pyrimidine based compounds<sup>11,15</sup>**  
**on LC3A tracer displacement, normalized on p62-LIR positive control.**

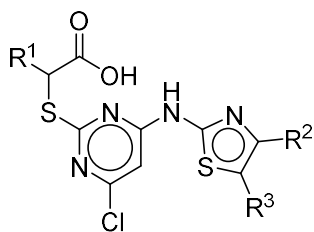

| Cpd-ID  | R <sup>1</sup>  | R <sup>2</sup> | R <sup>3</sup> | % tracer bound @LC3A |
|---------|-----------------|----------------|----------------|----------------------|
| (TH020) | <i>n</i> -hexyl |                | H              | 84                   |
| (TH018) | <i>n</i> -hexyl |                | H              | 81                   |
| (TH035) | ethyl           |                | H              | 85                   |
| (TH026) | <i>n</i> -hexyl |                | H              | 79                   |
| (TH057) | <i>n</i> -hexyl |                | Methyl         | 94                   |
| (TH100) | <i>n</i> -hexyl |                | Ethyl          | 77                   |
| (TH083) | <i>n</i> -hexyl |                | H              | 84                   |
| (TH102) | <i>n</i> -hexyl |                | H              | 78                   |
| (TH044) | <i>n</i> -hexyl |                | H              | 76                   |
| (TH054) | <i>n</i> -hexyl |                | H              | 75                   |
| (TH084) | <i>n</i> -hexyl |                | H              | 76                   |
| (TH107) | ethyl           |                | H              | 82                   |
| (TH034) | <i>n</i> -hexyl |                | H              | 79                   |
| (TH104) | <i>n</i> -hexyl |                | H              | 82                   |

|                   |                 |                                                                                    |   |    |
|-------------------|-----------------|------------------------------------------------------------------------------------|---|----|
| (TH105)           | <i>n</i> -hexyl | 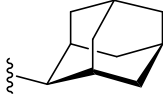  | H | 84 |
| (TH062)           | <i>n</i> -hexyl |  |   | 76 |
| (TH121)           | <i>n</i> -hexyl |   | H | 83 |
| (TH056)           | <i>n</i> -hexyl |   | H | 61 |
| <b>21 (TH152)</b> | <i>n</i> -hexyl |   | H | 26 |

Supplementary Table 4: X-ray data collection and refinement statistics

|                                    | 8Q53                | 7GAU                | 7GA8                | 7GA9                | 7GAA                | 7GAB                |
|------------------------------------|---------------------|---------------------|---------------------|---------------------|---------------------|---------------------|
| <b>Data collection<sup>a</sup></b> |                     |                     |                     |                     |                     |                     |
| Wavelength (Å)                     | 0.99999             | 0.92124             | 0.92124             | 0.92124             | 0.92124             | 0.92124             |
| Space group                        | P43                 | P43                 | P43                 | P43                 | P43                 | P43                 |
| Resolution (Å)                     | 42.61 – 1.36        | 61.00 – 1.59        | 30.68 – 1.87        | 30.49 – 2.17        | 30.91 – 2.03        | 43.05 – 2.23        |
| Last resolution shell (Å)          | 1.38 – 1.36         | 1.62 – 1.59         | 1.91 – 1.87         | 2.23 – 2.17         | 2.08 – 2.03         | 2.31 – 2.23         |
| Unit cell parameters               |                     |                     |                     |                     |                     |                     |
| a,b,c (Å)                          | 60.26, 60.26, 34.93 | 61.01, 61.01, 35.48 | 60.83, 60.83, 35.53 | 60.98, 60.98, 35.32 | 60.59, 60.59, 35.93 | 60.89, 60.89, 35.59 |
| $\alpha, \beta, \gamma$ (°)        | 90, 90, 90          | 90, 90, 90          | 90, 90, 90          | 90, 90, 90          | 90, 90, 90          | 90, 90, 90          |
| Total number of observations       | 181809 (17402)      | 241587 (10881)      | 150104 (9935)       | 93140 (6872)        | 116879 (8961)       | 87203 (7854)        |
| Unique reflections                 | 26382 (2575)        | 17826 (896)         | 10871 (687)         | 7021 (515)          | 8621 (641)          | 6512 (584)          |
| Mosaicity (°)                      | 0.13                | 0                   | 0                   | 0                   | 0                   | 0                   |
| Multiplicity                       | 6.9 (6.8)           | 13.6 (12.1)         | 13.8 (14.5)         | 13.3 (13.3)         | 13.6 (14.0)         | 13.4 (13.4)         |
| Mean I/ $\sigma$ (I)               | 21.11 (2.40)        | 11.9 (0.3)          | 14.4 (0.2)          | 8.8 (0.9)           | 12.3 (0.4)          | 10.3 (0.5)          |
| Completeness (%)                   | 97.08 (96.12)       | 100.0 (100.0)       | 99.5 (100.0)        | 99.7 (98.4)         | 100.0 (100.0)       | 100.0 (100.0)       |
| $R_{\text{merge}}^b$               | 0.042 (0.733)       | 0.092 (3.870)       | 0.083 (4.560)       | 0.199 (3.303)       | 0.186 (10.910)      | 0.144 (3.603)       |
| $R_{\text{meas}}^c$                | 0.046 (0.794)       | 0.095 (1.040)       | 0.087 (4.725)       | 0.208 (3.433)       | 0.194 (11.319)      | 0.150 (3.747)       |
| $R_{\text{pim}}^d$                 | 0.017 (0.302)       | 0.026 (1.150)       | 0.024 (1.235)       | 0.058 (0.931)       | 0.053 (3.000)       | 0.041 (1.022)       |
| <b>Refinement</b>                  |                     |                     |                     |                     |                     |                     |
| Resolution (Å)                     | 42.61 – 1.36        | 61.00 – 1.59        | 30.68 – 1.87        | 30.49 – 2.17        | 30.91-2.03          | 43.05 – 2.23        |
| Reflections used                   | 26378               | 16693               | 10093               | 6749                | 8268                | 6243                |
| Free R flagged reflections         | 1934                | 780                 | 426                 | 266                 | 330                 | 251                 |
| $R_{\text{cryst}}^e$               | 0.190               | 0.193               | 0.216               | 0.180               | 0.190               | 0.187               |
| $R_{\text{free}}^f$                | 0.210               | 0.215               | 0.274               | 0.246               | 0.248               | 0.276               |
| rmsd bonds (Å)                     | 0.007               | 0.008               | 0.006               | 0.008               | 0.007               | 0.009               |
| rmsd angles (°)                    | 0.99                | 1.542               | 1.428               | 1.518               | 1.547               | 1.625               |
| Ramachandran plot                  |                     |                     |                     |                     |                     |                     |
| Most favored (%)                   | 99.12               | 99.12               | 99.12               | 99.12               | 99.12               | 97.35               |
| Additionally allowed (%)           | 0.88                | 0.88                | 0.88                | 0.88                | 0.88                | 2.65                |
| Mean B-factor (Å <sup>2</sup> )    | 25.830              | 36.989              | 55.917              | 56.978              | 65.188              | 66.317              |

<sup>a</sup>Values for the last resolution shell are in parentheses.<sup>b</sup> $R_{\text{merge}} = \sum_{\text{hkl}} \sum_i |I_i(\text{hkl}) - \langle I(\text{hkl}) \rangle| / \sum_{\text{hkl}} \sum_i I_i(\text{hkl})$ , where  $I(\text{hkl})$  is the intensity of reflection hkl<sup>c</sup> $R_{\text{meas}} = \sum_{\text{hkl}} (n/(n-1))^{1/2} \sum_i |I_i(\text{hkl}) - \langle I(\text{hkl}) \rangle| / \sum_{\text{hkl}} \sum_i I_i(\text{hkl})$ <sup>d</sup> $R_{\text{pim}} = \sum_{\text{hkl}} (1/(n-1))^{1/2} \sum_i |I_i(\text{hkl}) - \langle I(\text{hkl}) \rangle| / \sum_{\text{hkl}} \sum_i I_i(\text{hkl})$ <sup>e</sup> $R_{\text{cryst}} = \sum_{\text{hkl}} ||F_{\text{obs}}| - |F_{\text{calc}}|| / \sum |F_{\text{obs}}|$ <sup>f</sup> $R_{\text{free}}$  is the cross-validation R-factor computed for the test set of unique reflections.

|                                    | 7GAC                | 7GAD                | 7GAE                | 7GAF                | 7GAG                | 7GAH                |
|------------------------------------|---------------------|---------------------|---------------------|---------------------|---------------------|---------------------|
| <b>Data collection<sup>a</sup></b> |                     |                     |                     |                     |                     |                     |
| Wavelength (Å)                     | 0.92124             | 0.92124             | 0.92124             | 0.92124             | 0.92124             | 0.92124             |
| Space group                        | P43                 | P43                 | P43                 | P43                 | P43                 | P43                 |
| Resolution (Å)                     | 42.88 – 1.91        | 61.02 – 1.86        | 43.08 – 1.92        | 42.98 – 1.84        | 61.00 – 1.59        | 30.60 – 1.90        |
| Last resolution shell (Å)          | 1.95 – 1.91         | 1.90 – 1.86         | 1.96 – 1.92         | 1.88 – 1.84         | 1.62 – 1.59         | 1.95 – 1.90         |
| Unit cell parameters               |                     |                     |                     |                     |                     |                     |
| a,b,c (Å)                          | 60.62, 60.62, 35.85 | 61.03, 61.03, 35.55 | 60.92, 60.92, 35.65 | 60.80, 60.80, 35.38 | 61.01, 61.01, 35.48 | 61.20, 61.20, 35.27 |
| α, β, γ (°)                        | 90, 90, 90          | 90, 90, 90          | 90, 90, 90          | 90, 90, 90          | 90, 90, 90          | 90, 90, 90          |
| Total number of observations       | 140194 (9706)       | 152869 (9459)       | 139496 (9520)       | 156378 (9812)       | 241587 (10881)      | 138579 (11039)      |
| Unique reflections                 | 10254 (684)         | 11186 (665)         | 10230 (675)         | 11438 (689)         | 17826 (896)         | 10488 (771)         |
| Mosaicity (°)                      | 0                   | 0                   | 0                   | 0                   | 0                   | 0                   |
| Multiplicity                       | 13.7 (14.2)         | 13.7 (14.2)         | 13.6 (14.1)         | 13.7 (14.2)         | 13.6 (12.1)         | 13.2 (14.3)         |
| Mean I/σ(I)                        | 9.8 (0.3)           | 15.2 (0.2)          | 11.6 (0.4)          | 13.4 (0.3)          | 11.9 (0.3)          | 15.0 (1.0)          |
| Completeness (%)                   | 99.5 (100.0)        | 99.8 (96.4)         | 99.8 (97.5)         | 100.0 (99.7)        | 100.0 (100.0)       | 100.0 (100.0)       |
| $R_{\text{merge}}^b$               | 0.125 (5.485)       | 0.082 (5.795)       | 0.113 (3.518)       | 0.088 (5.554)       | 0.092 (3.870)       | 0.127 (2.878)       |
| $R_{\text{meas}}^c$                | 0.131 (5.665)       | 0.086 (6.163)       | 0.118 (3.652)       | 0.091 (5.761)       | 0.095 (1.040)       | 0.133 (2.985)       |
| $R_{\text{pim}}^d$                 | 0.036 (1.506)       | 0.023 (1.585)       | 0.045 (1.378)       | 0.025 (1.526)       | 0.026 (1.150)       | 0.038 (0.787)       |
| <b>Refinement</b>                  |                     |                     |                     |                     |                     |                     |
| Resolution (Å)                     | 42.88 – 1.91        | 61.02 – 1.86        | 43.08 – 1.92        | 42.98 – 1.84        | 61.00 – 1.59        | 30.60 – 1.90        |
| Reflections used                   | 9760                | 10362               | 9804                | 10740               | 16693               | 10053               |
| Free R flagged reflections         | 408                 | 436                 | 407                 | 468                 | 780                 | 421                 |
| $R_{\text{cryst}}^e$               | 0.207               | 0.201               | 0.197               | 0.194               | 0.193               | 0.199               |
| $R_{\text{free}}^f$                | 0.260               | 0.258               | 0.251               | 0.245               | 0.215               | 0.254               |
| rmsd bonds (Å)                     | 0.008               | 0.008               | 0.008               | 0.009               | 0.008               | 0.009               |
| rmsd angles (°)                    | 1.539               | 1.524               | 1.594               | 1.591               | 1.542               | 1.628               |
| Ramachandran plot                  |                     |                     |                     |                     |                     |                     |
| Most favored (%)                   | 100                 | 99.12               | 99.12               | 100                 | 99.12               | 100                 |
| Additionally allowed (%)           | 0.00                | 0.88                | 0.88                | 0.00                | 0.88                | 0.00                |
| Mean B-factor (Å <sup>2</sup> )    | 53.402              | 53.986              | 50.216              | 53.317              | 36.989              | 47.276              |

<sup>a</sup>Values for the last resolution shell are in parentheses.

<sup>b</sup> $R_{\text{merge}} = \sum_{\text{hkl}} \sum_i |I_i(\text{hkl}) - \langle I(\text{hkl}) \rangle| / \sum_{\text{hkl}} \sum_i I_i(\text{hkl})$ , where  $I(\text{hkl})$  is the intensity of reflection hkl

<sup>c</sup> $R_{\text{meas}} = \sum_{\text{hkl}} (n/(n-1))^{1/2} \sum_i |I_i(\text{hkl}) - \langle I(\text{hkl}) \rangle| / \sum_{\text{hkl}} \sum_i I_i(\text{hkl})$

<sup>d</sup> $R_{\text{pim}} = \sum_{\text{hkl}} (1/(n-1))^{1/2} \sum_i |I_i(\text{hkl}) - \langle I(\text{hkl}) \rangle| / \sum_{\text{hkl}} \sum_i I_i(\text{hkl})$

<sup>e</sup> $R_{\text{cryst}} = \sum_{\text{hkl}} ||F_{\text{obs}}| - |F_{\text{calc}}|| / \sum |F_{\text{obs}}|$

<sup>f</sup> $R_{\text{free}}$  is the cross-validation R-factor computed for the test set of unique reflections.

|                                    | 7GAI                | 7GAJ                | 7GAK                | 7GAL                | 7GAM                | 7GAN                |
|------------------------------------|---------------------|---------------------|---------------------|---------------------|---------------------|---------------------|
| <b>Data collection<sup>a</sup></b> |                     |                     |                     |                     |                     |                     |
| Wavelength (Å)                     | 0.92124             | 0.92124             | 0.92124             | 0.92124             | 0.92124             | 0.92124             |
| Space group                        | P43                 | P43                 | P43                 | P43                 | P43                 | P43                 |
| Resolution (Å)                     | 61.00 – 1.97        | 43.15 – 1.89        | 30.40 – 1.77        | 43.05 – 1.90        | 60.67 – 1.75        | 43.19 – 2.09        |
| Last resolution shell (Å)          | 2.02 – 1.97         | 1.93 – 1.89         | 1.81 – 1.77         | 1.94 – 1.90         | 1.78 – 1.75         | 2.15 – 2.09         |
| Unit cell parameters               |                     |                     |                     |                     |                     |                     |
| a,b,c (Å)                          | 60.98, 60.98, 35.59 | 61.00, 61.00, 35.33 | 60.81, 60.81, 35.10 | 60.87, 60.87, 35.41 | 60.68, 60.68, 35.61 | 61.09, 61.09, 35.54 |
| α, β, γ (°)                        | 90, 90, 90          | 90, 90, 90          | 90, 90, 90          | 90, 90, 90          | 90, 90, 90          | 90, 90, 90          |
| Total number of observations       | 128225 (9138)       | 145177 (9643)       | 173163 (9502)       | 141587 (9231)       | 180563 (9230)       | 106979 (8388)       |
| Unique reflections                 | 9444 (650)          | 10634 (680)         | 12673 (736)         | 10401 (656)         | 13277 (723)         | 7949 (608)          |
| Mosaicity (°)                      | 0                   | 0                   | 0                   | 0                   | 0                   | 0                   |
| Multiplicity                       | 13.6 (14.1)         | 13.7 (14.2)         | 13.7 (12.9)         | 13.6 (14.1)         | 13.6 (12.8)         | 13.5 (13.8)         |
| Mean I/σ(I)                        | 14.7 (0.4)          | 10.5 (0.3)          | 13.6 (0.3)          | 9.2 (0.3)           | 14.3 (0.4)          | 10.4 (0.5)          |
| Completeness (%)                   | 99.9 (98.4)         | 100.0 (100.0)       | 100.0 (99.4)        | 99.9 (99.2)         | 99.9 (98.3)         | 99.9 (99.3)         |
| $R_{\text{merge}}^b$               | 0.076 (2.872)       | 0.113 (5.099)       | 0.104 (6.109)       | 0.118 (3.840)       | 0.068 (2.668)       | 0.124 (3.388)       |
| $R_{\text{meas}}^c$                | 0.079 (2.980)       | 0.118 (5.288)       | 0.109 (6.361)       | 0.123 (3.985)       | 0.070 (2.878)       | 0.129 (3.517)       |
| $R_{\text{pim}}^d$                 | 0.022 (0.793)       | 0.032 (1.395)       | 0.030 (1.764)       | 0.033 (1.059)       | 0.026 (1.122)       | 0.035 (0.937)       |
| <b>Refinement</b>                  |                     |                     |                     |                     |                     |                     |
| Resolution (Å)                     | 61.00 – 1.97        | 43.15 – 1.89        | 30.40 – 1.77        | 43.05 – 1.90        | 60.67 – 1.75        | 43.19 – 2.09        |
| Reflections used                   | 9017                | 9956                | 12022               | 9695                | 12594               | 7594                |
| Free R flagged reflections         | 361                 | 419                 | 549                 | 402                 | 583                 | 299                 |
| $R_{\text{cryst}}^e$               | 0.207               | 0.184               | 0.200               | 0.193               | 0.197               | 0.189               |
| $R_{\text{free}}^f$                | 0.281               | 0.229               | 0.250               | 0.251               | 0.234               | 0.256               |
| rmsd bonds (Å)                     | 0.007               | 0.008               | 0.009               | 0.006               | 0.010               | 0.007               |
| rmsd angles (°)                    | 1.541               | 1.550               | 1.619               | 1.424               | 1.626               | 1.482               |
| Ramachandran plot                  |                     |                     |                     |                     |                     |                     |
| Most favored (%)                   | 99.12               | 98.23               | 100                 | 100                 | 100                 | 98.23               |
| Additionally allowed (%)           | 0.88                | 1.77                | 0.00                | 0.00                | 0.00                | 1.77                |
| Mean B-factor (Å <sup>2</sup> )    | 62.225              | 50.720              | 49.773              | 52.913              | 48.775              | 59.148              |

<sup>a</sup>Values for the last resolution shell are in parentheses.

<sup>b</sup> $R_{\text{merge}} = \sum_{\text{hkl}} \sum_i |I_i(\text{hkl}) - \langle I(\text{hkl}) \rangle| / \sum_{\text{hkl}} \sum_i I_i(\text{hkl})$ , where  $I(\text{hkl})$  is the intensity of reflection hkl

<sup>c</sup> $R_{\text{meas}} = \sum_{\text{hkl}} (n/(n-1))^{1/2} \sum_i |I_i(\text{hkl}) - \langle I(\text{hkl}) \rangle| / \sum_{\text{hkl}} \sum_i I_i(\text{hkl})$

<sup>d</sup> $R_{\text{pim}} = \sum_{\text{hkl}} (1/(n-1))^{1/2} \sum_i |I_i(\text{hkl}) - \langle I(\text{hkl}) \rangle| / \sum_{\text{hkl}} \sum_i I_i(\text{hkl})$

<sup>e</sup> $R_{\text{cryst}} = \sum_{\text{hkl}} ||F_{\text{obs}}| - |F_{\text{calc}}|| / \sum |F_{\text{obs}}|$

<sup>f</sup> $R_{\text{free}}$  is the cross-validation R-factor computed for the test set of unique reflections.

|                                    | 7GAO                   | 7GAP                   | 7GAQ                   | 7GAR                   | 7GAS                   |
|------------------------------------|------------------------|------------------------|------------------------|------------------------|------------------------|
| <b>Data collection<sup>a</sup></b> |                        |                        |                        |                        |                        |
| Wavelength (Å)                     | 0.92124                | 0.92124                | 0.92124                | 0.92124                | 0.92124                |
| Space group                        | P43                    | P43                    | P43                    | P43                    | P43                    |
| Resolution (Å)                     | 30.56 – 1.69           | 30.63 – 1.68           | 30.69 – 2.14           | 30.58 – 2.07           | 30.66 – 1.91           |
| Last resolution shell (Å)          | 1.72 – 1.69            | 1.71 – 1.68            | 2.20 – 2.14            | 2.13 – 2.07            | 1.96 – 1.91            |
| Unit cell parameters               |                        |                        |                        |                        |                        |
| a,b,c (Å)                          | 61.07, 61.07,<br>35.30 | 61.21, 61.21,<br>35.38 | 61.18, 61.18,<br>35.47 | 61.03, 61.03,<br>35.29 | 60.85, 60.85,<br>35.50 |
| α, β, γ (°)                        | 90, 90, 90             | 90, 90, 90             | 90, 90, 90             | 90, 90, 90             | 90, 90, 90             |
| Total number of observations       | 201357 (10272)         | 207746 (10646)         | 98511 (7335)           | 109090 (8464)          | 140622 (9796)          |
| Unique reflections                 | 14738 (749)            | 15116 (760)            | 7415 (532)             | 8083 (600)             | 10191 (681)            |
| Mosaicity (°)                      | 0                      | 0                      | 0                      | 0                      | 0                      |
| Multiplicity                       | 13.7 (13.7)            | 13.7 (14.0)            | 13.3 (13.8)            | 13.5 (14.1)            | 13.8 (14.4)            |
| Mean I/σ(I)                        | 10.2 (0.5)             | 9.9 (0.3)              | 6.5 (0.7)              | 8.6 (0.3)              | 10.8 (0.3)             |
| Completeness (%)                   | 99.9 (99.1)            | 99.6 (98.8)            | 100.0 (100.0)          | 99.8 (98.8)            | 99.2 (98.2)            |
| $R_{\text{merge}}^b$               | 0.262 (13.352)         | 0.153 (5.552)          | 0.377 (4.262)          | 0.173 (7.250)          | 0.141 (7.310)          |
| $R_{\text{meas}}^c$                | 0.273 (13.865)         | 0.159 (5.761)          | 0.392 (4.426)          | 0.181 (7.521)          | 0.146 (7.580)          |
| $R_{\text{pim}}^d$                 | 0.074 (3.716)          | 0.043 (1.530)          | 0.107 (1.187)          | 0.050 (1.991)          | 0.040 (1.989)          |
| <b>Refinement</b>                  |                        |                        |                        |                        |                        |
| Resolution (Å)                     | 30.56 – 1.69           | 30.63 – 1.68           | 30.69 – 2.14           | 30.57 – 2.07           | 30.68 – 1.91           |
| Reflections used                   | 14048                  | 14358                  | 7114                   | 7677                   | 9624                   |
| Free R flagged reflections         | 660                    | 674                    | 289                    | 304                    | 400                    |
| $R_{\text{cryst}}^e$               | 0.192                  | 0.203                  | 0.188                  | 0.191                  | 0.219                  |
| $R_{\text{free}}^f$                | 0.218                  | 0.244                  | 0.244                  | 0.264                  | 0.276                  |
| rmsd bonds (Å)                     | 0.007                  | 0.008                  | 0.008                  | 0.007                  | 0.008                  |
| rmsd angles (°)                    | 1.459                  | 1.494                  | 1.509                  | 1.507                  | 1.549                  |
| Ramachandran plot                  |                        |                        |                        |                        |                        |
| Most favored (%)                   | 100                    | 99.12                  | 100                    | 97.35                  | 99.12                  |
| Additionally allowed (%)           | 0.00                   | 0.88                   | 0.00                   | 1.77                   | 0.88                   |
| Mean B-factor (Å <sup>2</sup> )    | 35.080                 | 35.028                 | 43.990                 | 62.764                 | 54.217                 |

<sup>a</sup>Values for the last resolution shell are in parentheses.

<sup>b</sup> $R_{\text{merge}} = \sum_{\text{hkl}} \sum_i |I_i(\text{hkl}) - \langle I(\text{hkl}) \rangle| / \sum_{\text{hkl}} \sum_i I_i(\text{hkl})$ , where  $I(\text{hkl})$  is the intensity of reflection hkl

<sup>c</sup> $R_{\text{meas}} = \sum_{\text{hkl}} (n/(n-1))^{1/2} \sum_i |I_i(\text{hkl}) - \langle I(\text{hkl}) \rangle| / \sum_{\text{hkl}} \sum_i I_i(\text{hkl})$

<sup>d</sup> $R_{\text{pim}} = \sum_{\text{hkl}} (1/(n-1))^{1/2} \sum_i |I_i(\text{hkl}) - \langle I(\text{hkl}) \rangle| / \sum_{\text{hkl}} \sum_i I_i(\text{hkl})$

<sup>e</sup> $R_{\text{cryst}} = \sum_{\text{hkl}} ||F_{\text{obs}}| - |F_{\text{calc}}|| / \sum |F_{\text{obs}}|$

<sup>f</sup> $R_{\text{free}}$  is the cross-validation R-factor computed for the test set of unique reflections.



Supplementary Table 5: Small molecule screening data

| Category          | Parameter                                | Description                                                                                                                                                                                                                                                                    |
|-------------------|------------------------------------------|--------------------------------------------------------------------------------------------------------------------------------------------------------------------------------------------------------------------------------------------------------------------------------|
| Assay             | Type of assay                            | Crystallographic Fragment Screening                                                                                                                                                                                                                                            |
|                   | Target                                   | Microtubule-associated proteins 1A/1B light chain 3B (Uniprot ID: Q9GZQ8)                                                                                                                                                                                                      |
|                   | Primary measurement                      | Detection of bound fragments and possibly identify novel binding sites                                                                                                                                                                                                         |
|                   | Key reagents                             | <ul style="list-style-type: none"> <li>DSi Poised fragment library solubilized in 100% DMSO</li> <li>MAP1LC3B protein in 30 mM HEPES pH 7.5, 100 mM NaCl, 0.5 mM TCEP, 5% Glycerol</li> <li>Crystallization condition: 36% PEG 8000, 0.1M acetate pH 4.7</li> </ul>            |
|                   | Assay protocol                           | <ul style="list-style-type: none"> <li><a href="https://dx.doi.org/10.3791/62414">https://dx.doi.org/10.3791/62414</a></li> <li>Also detailed in our manuscript under subheading "Fragment Screening and Structure Solution" in "Methods" section</li> </ul>                   |
|                   | Additional comments                      | Some crystals are bound to re-solubilize while soaking. They can be repeated with lower DMSO concentration and/or soaking durations.                                                                                                                                           |
| Library           | Library size                             | 988 fragment molecules                                                                                                                                                                                                                                                         |
|                   | Library composition                      | Poised fragments contain at least one functional group which can be synthesised using a robust, well-characterised reaction. Reactions include amide couplings, Suzuki-type aryl-aryl couplings and reductive aminations.                                                      |
|                   | Source                                   | Xchem (Diamond Light Source, UK); Also available from Enamine                                                                                                                                                                                                                  |
|                   | Additional comments                      | <a href="https://www.diamond.ac.uk/Instruments/Mx/Fragment-Screening/Fragment-Libraries/DSi-Poised-Library.html">https://www.diamond.ac.uk/Instruments/Mx/Fragment-Screening/Fragment-Libraries/DSi-Poised-Library.html</a>                                                    |
| Screen            | Format                                   | <ul style="list-style-type: none"> <li>Fragment source plate: 1536 LDV ECHO-compatible plate</li> </ul>                                                                                                                                                                        |
|                   | Concentration(s) tested                  | <ul style="list-style-type: none"> <li>Crystallization plates: 96 well 3-drop SWISSCI plates</li> <li>100 mM (20% DMSO)</li> <li>50.6 mM (10% DMSO)</li> </ul>                                                                                                                 |
|                   | Plate controls                           | Crystal stability over time and DMSO concentrations was tested with DMSO soak only                                                                                                                                                                                             |
|                   | Reagent/ compound dispensing system      | ECHO Liquid Handler                                                                                                                                                                                                                                                            |
|                   | Detection instrument and software        | x-ray detector: DECTRIS PILATUS 6M                                                                                                                                                                                                                                             |
|                   | Assay validation/QC                      | Structures solved through XChemExplorer (XCE) pipeline                                                                                                                                                                                                                         |
|                   | Correction factors                       | Data scaling (Corrections due to beam fluctuations, crystal decay, absorption)                                                                                                                                                                                                 |
|                   | Normalization                            | n.a.                                                                                                                                                                                                                                                                           |
|                   | Additional comments                      | Information on Xchem facility can be accessed here:<br><a href="https://www.diamond.ac.uk/Instruments/Mx/Fragment-Screening/The-XChem-Pipeline.html">https://www.diamond.ac.uk/Instruments/Mx/Fragment-Screening/The-XChem-Pipeline.html</a>                                   |
| Post-HTS analysis | Hit criteria                             | Observable density in event maps                                                                                                                                                                                                                                               |
|                   | Hit rate                                 | 21 hits were obtained out of 988                                                                                                                                                                                                                                               |
|                   | Additional assay(s)                      | n.a.                                                                                                                                                                                                                                                                           |
|                   | Confirmation of hit purity and structure | QC information can be downloaded from the link:<br><a href="https://www.diamond.ac.uk/Instruments/Mx/Fragment-Screening/Fragment-Libraries/DSi-Poised-Library.html">https://www.diamond.ac.uk/Instruments/Mx/Fragment-Screening/Fragment-Libraries/DSi-Poised-Library.html</a> |
|                   | Additional comments                      | n.a.                                                                                                                                                                                                                                                                           |

### Supplementary References:

- 1 Li, Z. *et al.* Allele-selective lowering of mutant HTT protein by HTT-LC3 linker compounds. *Nature* **575**, 203-209 (2019). <https://doi.org:10.1038/s41586-019-1722-1>
- 2 Fan, S. *et al.* Inhibition of Autophagy by a Small Molecule through Covalent Modification of the LC3 Protein. *Angew Chem Int Ed Engl* **60**, 26105-26114 (2021). <https://doi.org:10.1002/anie.202109464>
- 3 Tsuganezawa, K. *et al.* Two-colored fluorescence correlation spectroscopy screening for LC3-P62 interaction inhibitors. *J Biomol Screen* **18**, 1103-1109 (2013). <https://doi.org:10.1177/1087057113492200>
- 4 Hartmann, M. *et al.* Demonstrating Ligandability of the LC3A and LC3B Adapter Interface. *J Med Chem* **64**, 3720-3746 (2021). <https://doi.org:10.1021/acs.jmedchem.0c01564>
- 5 Wirth, M. *et al.* Molecular determinants regulating selective binding of autophagy adapters and receptors to ATG8 proteins. *Nat Commun* **10**, 2055 (2019). <https://doi.org:10.1038/s41467-019-10059-6>
- 6 Rogov, V. V. *et al.* Phosphorylation of the mitochondrial autophagy receptor Nix enhances its interaction with LC3 proteins. *Sci Rep* **7**, 1131 (2017). <https://doi.org:10.1038/s41598-017-01258-6>
- 7 Stolz, A. *et al.* Fluorescence-based ATG8 sensors monitor localization and function of LC3/GABARAP proteins. *EMBO J* **36**, 549-564 (2017). <https://doi.org:10.15252/emj.201695063>
- 8 Holdgaard, S. G. *et al.* Selective autophagy maintains centrosome integrity and accurate mitosis by turnover of centriolar satellites. *Nat Commun* **10**, 4176 (2019). <https://doi.org:10.1038/s41467-019-12094-9>

- 9 Di Rita, A. *et al.* HUWE1 E3 ligase promotes PINK1/PARKIN-independent mitophagy by regulating AMBRA1 activation via IKKalpha. *Nat Commun* **9**, 3755 (2018).  
<https://doi.org/10.1038/s41467-018-05722-3>
- 10 Dong, G. *et al.* Ispinesib as an Effective Warhead for the Design of Autophagosome-Tethering Chimeras: Discovery of Potent Degraders of Nicotinamide Phosphoribosyltransferase (NAMPT). *J Med Chem* **65**, 7619-7628 (2022).  
<https://doi.org/10.1021/acs.jmedchem.1c02001>
- 11 Hanke, T. *et al.* Identification of pirinixic acid derivatives bearing a 2-aminothiazole moiety combines dual PPARalpha/gamma activation and dual 5-LO/mPGES-1 inhibition. *Bioorg Med Chem Lett* **24**, 3757-3763 (2014).  
<https://doi.org/10.1016/j.bmcl.2014.06.077>
- 12 Hanke, T. *et al.* Synthesis and pharmacological characterization of benzenesulfonamides as dual species inhibitors of human and murine mPGES-1. *Bioorg Med Chem* **21**, 7874-7883 (2013). <https://doi.org/10.1016/j.bmc.2013.10.006>
- 13 Hanke, T. *et al.* Development and Characterization of Type I, Type II, and Type III LIM-Kinase Chemical Probes. *J Med Chem* **65**, 13264-13287 (2022).  
<https://doi.org/10.1021/acs.jmedchem.2c01106>
- 14 Hanke, T. *et al.* A Selective Modulator of Peroxisome Proliferator-Activated Receptor gamma with an Unprecedented Binding Mode. *J Med Chem* **63**, 4555-4561 (2020).  
<https://doi.org/10.1021/acs.jmedchem.9b01786>
- 15 Hanke, T. *et al.* Amino-thiazole-featured pirinixic acid derivatives as dual 5-lipoxygenase and microsomal prostaglandin E2 synthase-1 inhibitors with improved potency and efficiency in vivo. *J Med Chem* **56**, 9031-9044 (2013).  
<https://doi.org/10.1021/jm401557w>
